# Supplementary material for: Chaetosemins A–E, new chromones isolated from an Ascomycete Chaetomium seminudum and their biological activities
Source: Royal Society of Chemistry journal article supplement (doi:10.1039/c5ra00525f), 2015-01-01
Supplement: c5ra00525f1.pdf [file c5ra00525f1.pdf]

*Supporting Information Available*

**Chaetosemins A-E, New Chromones Isolated from an Ascomycete  
*Chaetomium seminudum* and Their Biological Activities**

He Li,<sup>a</sup> Jun-Mian Tian,<sup>a</sup> Hao-Yu Tang,<sup>a</sup> Shi-Yin Pan,<sup>b</sup> An-Ling Zhang,<sup>a\*</sup>  
and Jin-Ming Gao<sup>a\*</sup>

<sup>a</sup>Shaanxi Key Laboratory of Natural Products Chemical Biology, College of Science,  
Northwest A&F University, Yangling 712100, Shaanxi, China

<sup>b</sup> Xi'an No.1 Hospital, Shaanxi Institute of Ophthalmology, Xi'an 710002,  
Shaanxi, China

Corresponding author:

Prof. An-Ling Zhang and Prof. Dr. Jin-Ming Gao. Tel.: +86-29-87092515

E-mail: jinminggao@nwsuaf.edu.cn

|                                                                                      |     |
|--------------------------------------------------------------------------------------|-----|
| Figure S1. $^1\text{H}$ spectra of chaetosemin A in $\text{CD}_3\text{OD}$ .....     | 3   |
| Figure S2. $^{13}\text{C}$ spectra of chaetosemin A in $\text{CD}_3\text{OD}$ .....  | 3   |
| Figure S3. HRESIMS spectra of chaetosemin A.....                                     | 4   |
| Figure S4. HSQC spectra of chaetosemin A.....                                        | 5   |
| Figure S5. COSY spectra of chaetosemin A.....                                        | 6   |
| Figure S6. HMBC spectra of chaetosemin A.....                                        | 7   |
| Figure S7. IR spectra of chaetosemin A.....                                          | 8   |
| Figure S8. UV spectra of chaetosemin A.....                                          | 9   |
| Table S1. Crystal data and structure refinement for chaetosemin A.....               | 10  |
| Figure S9. $^1\text{H}$ spectra of chaetosemin B in $\text{CDCl}_3$ .....            | 11  |
| Figure S10. $^{13}\text{C}$ spectra of chaetosemin B in $\text{CDCl}_3$ .....        | 12  |
| Figure S11. HRESIMS spectra of chaetosemin B.....                                    | 113 |
| Figure S12. HSQC spectra of chaetosemin B.....                                       | 14  |
| Figure S13. COSY spectra of chaetosemin B.....                                       | 15  |
| Figure S14. HMBC spectra of chaetosemin B.....                                       | 16  |
| Figure S15. IR spectra of chaetosemin B.....                                         | 17  |
| Figure S16. UV spectra of chaetosemin B.....                                         | 18  |
| Figure S17. $^1\text{H}$ spectra of chaetosemin C in $\text{CD}_3\text{OD}$ .....    | 19  |
| Figure S18. $^{13}\text{C}$ spectra of chaetosemin C in $\text{CD}_3\text{OD}$ ..... | 20  |
| Figure S19. HRESIMS spectra of chaetosemin C.....                                    | 21  |
| Figure S20. HSQC spectra of chaetosemin C.....                                       | 22  |
| Figure S21. COSY spectra of chaetosemin C.....                                       | 223 |
| Figure S22. HMBC spectra of chaetosemin C.....                                       | 24  |
| Figure S23. IR spectra of chaetosemin C.....                                         | 25  |
| Figure S24. UV spectra of chaetosemin C.....                                         | 26  |
| Figure S25. $^1\text{H}$ spectra of chaetosemin D in $\text{CD}_3\text{OD}$ .....    | 27  |
| Figure S26. $^{13}\text{C}$ spectra of chaetosemin D in $\text{CD}_3\text{OD}$ ..... | 28  |
| Figure S27. HRESIMS spectra of chaetosemin D.....                                    | 29  |
| Figure S28. HSQC spectra of chaetosemin D.....                                       | 30  |
| Figure S29. HMBC spectra of chaetosemin D.....                                       | 31  |
| Figure S30. IR spectra of chaetosemin D.....                                         | 322 |
| Figure S31. UV spectra of chaetosemin D.....                                         | 333 |
| Figure S32. $^1\text{H}$ spectra of chaetosemin E in $\text{DMSO-d}_6$ .....         | 344 |
| Figure S33. $^{13}\text{C}$ spectra of chaetosemin E in $\text{DMSO-d}_6$ .....      | 355 |
| Figure S34. HRESIMS spectra of chaetosemin E.....                                    | 366 |
| Figure S35. HSQC spectra of chaetosemin E.....                                       | 377 |
| Figure S36. COSY spectra of chaetosemin E.....                                       | 388 |
| Figure S37. HMBC spectra of chaetosemin E.....                                       | 399 |
| Figure S38. IR spectra of chaetosemin E.....                                         | 40  |
| Figure S39. UV spectra of chaetosemin E.....                                         | 41  |

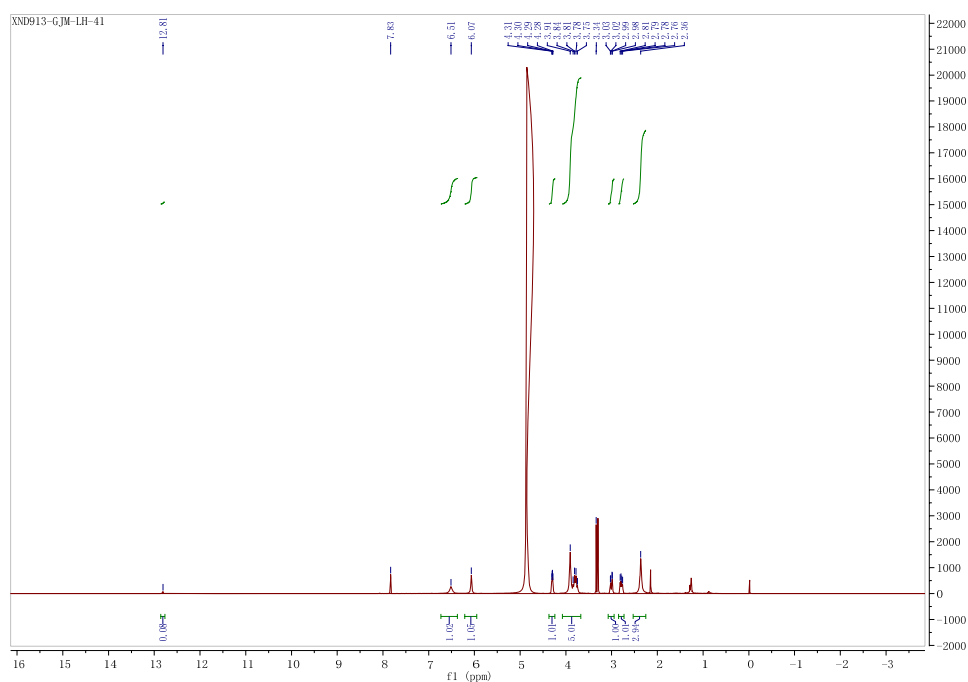

Figure S1.  $^1\text{H}$  spectra of chaetosemin A in  $\text{CD}_3\text{OD}$

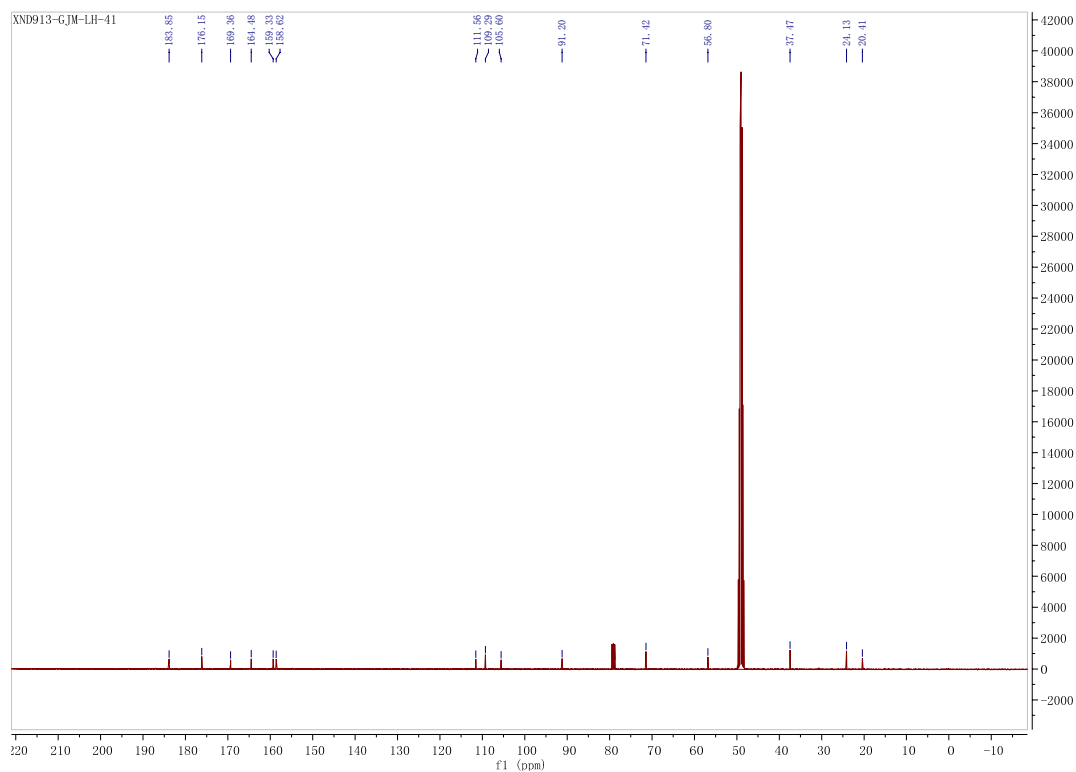

Figure S2.  $^{13}\text{C}$  spectra of chaetosemin A in  $\text{CD}_3\text{OD}$

Data File: D:\分子生物学\2013-07-29\cd-2\_LH-41\_20.kd

| Elem | Val | Min | Max | Use Adduct |
|------|-----|-----|-----|------|-----|-----|-----|------|-----|-----|-----|------|-----|-----|-----|------------|
| H    | 1   | 0   | 200 | N    | 3   | 0   | 0   | P    | 3   | 0   | 0   | Br   | 1   | 0   | 0   | H          |
| B    | 3   | 0   | 0   | O    | 2   | 0   | 50  | S    | 2   | 0   | 0   | I    | 3   | 0   | 0   |            |
| C    | 4   | 0   | 100 | F    | 1   | 0   | 0   | Cl   | 1   | 0   | 0   |      |     |     |     |            |

Error Margin (ppm): 20  
 HD Ratio: unlimited  
 Max Isotopes: all  
 MSn Iso RI (%): 75.00

DBE Range: 0.0 - 30.0  
 Apply N Rule: no  
 Isotope RI (%): 1.00  
 MSn Logic Mode: OR

Electron Ion: both  
 Use MSn Info: yes  
 Isotope Res: 10000  
 Max Results: 500

Event#: 1 (MS/E+). Ret. Time: 0.443 -> 0.965. Scan#: 92 -> 139

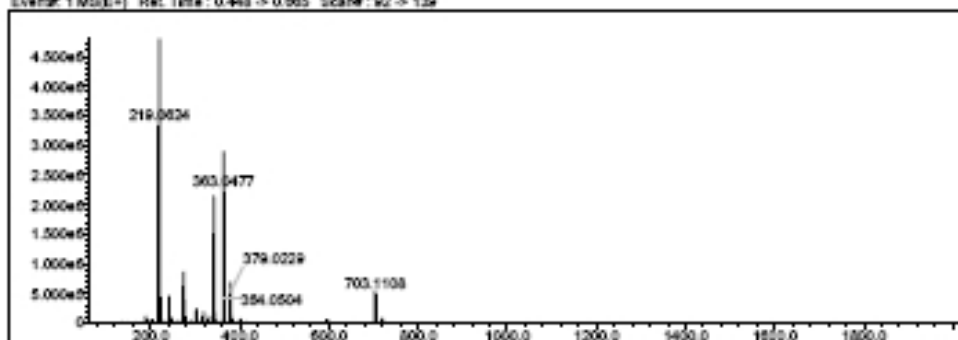

Measured region for 341.0668 m/z

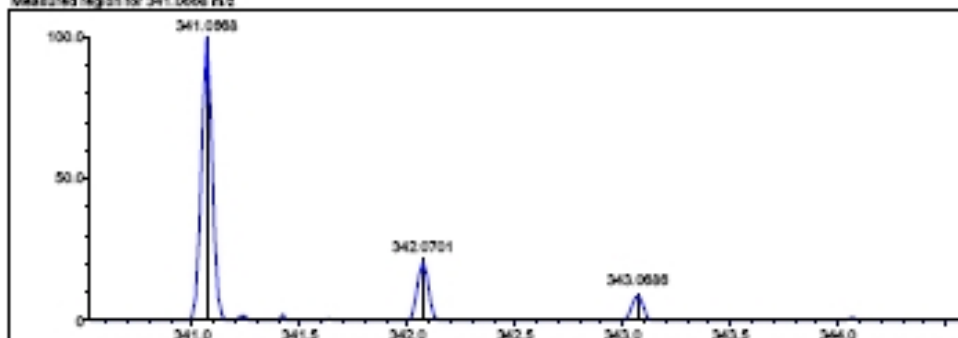

C15H16O7.2 (M+H)+ - Predicted region for 341.0690 m/z

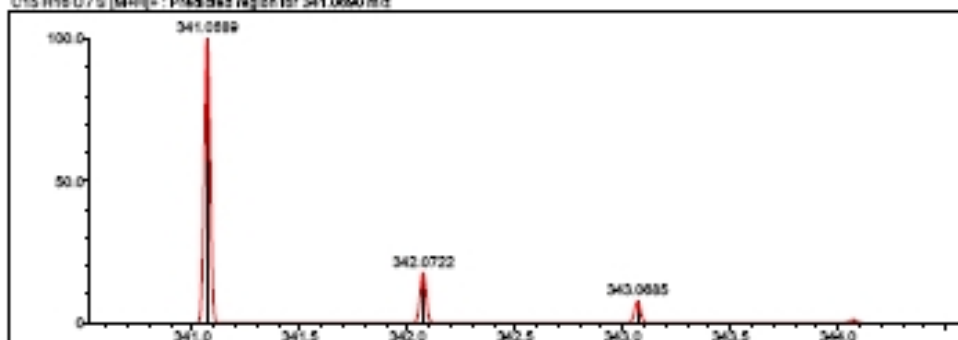

| Rank | Score | Ion    | Formula (M) | Pred. m/z | Mass. m/z | Df. (mDa) | Df. (ppm) | Isr   | DBE |
|------|-------|--------|-------------|-----------|-----------|-----------|-----------|-------|-----|
| 1    | 70.22 | (M+H)+ | C15H16O7.2  | 341.0690  | 341.0668  | -2.2      | -6.43     | 93.00 | 6.0 |

Figure S3. HRESIMS spectra of chaetosemin A

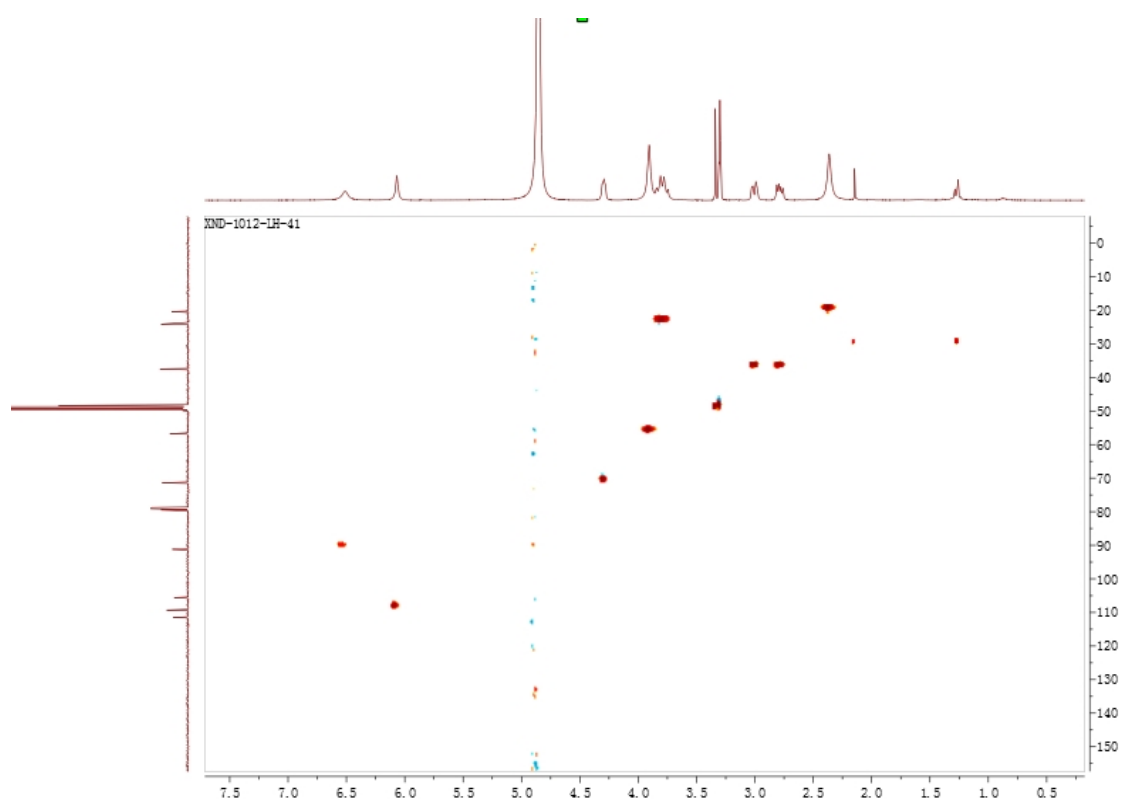

**Figure S4. HSQC spectra of chaetosemin A**

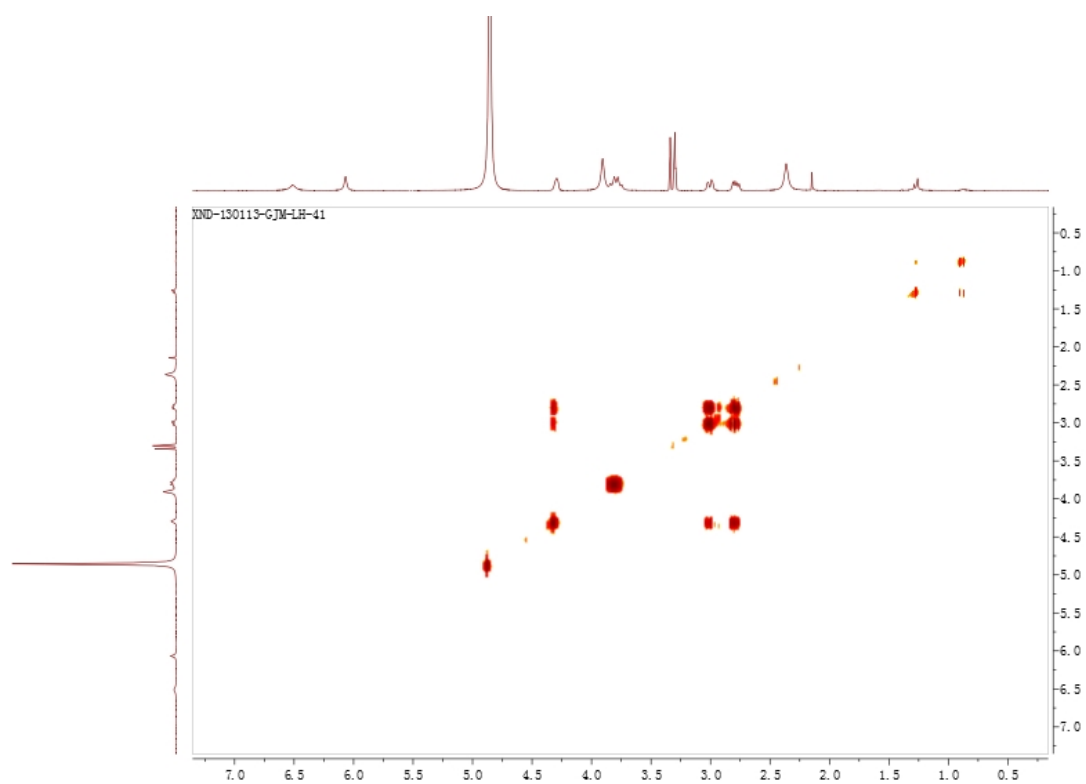

**Figure S5. COSY spectra of chaetosemin A**

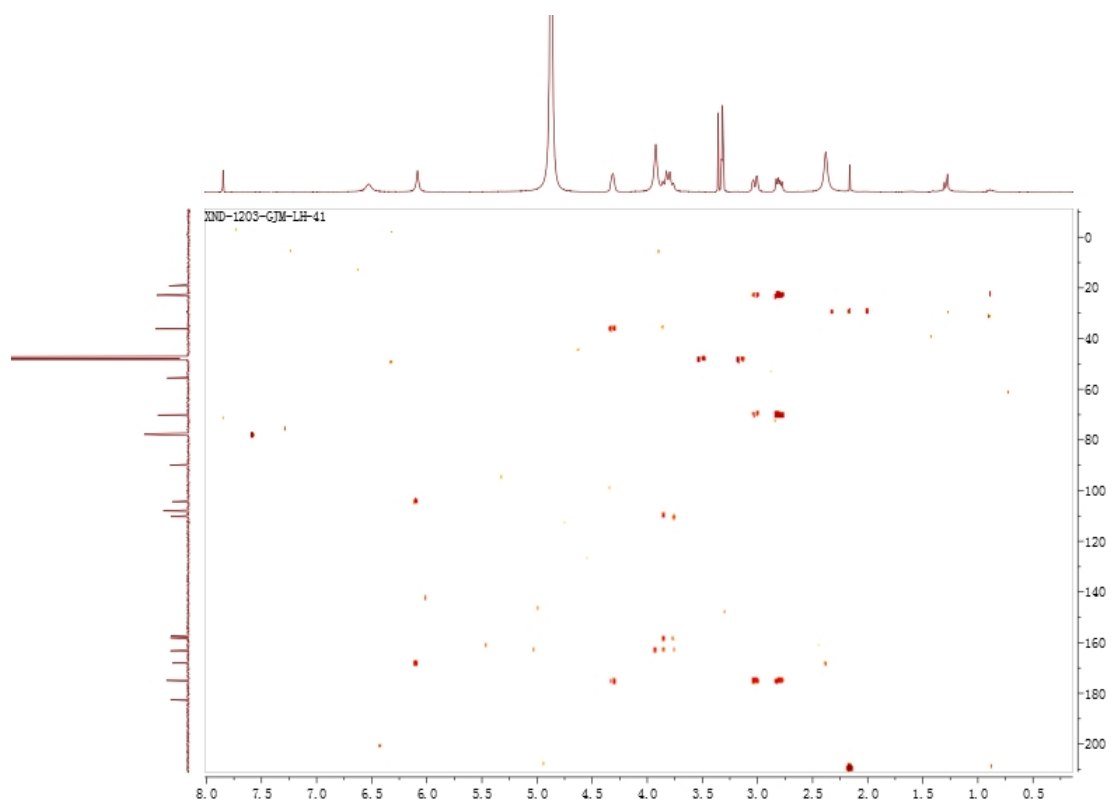

**Figure S6. HMBC spectra of chaetosemin A**

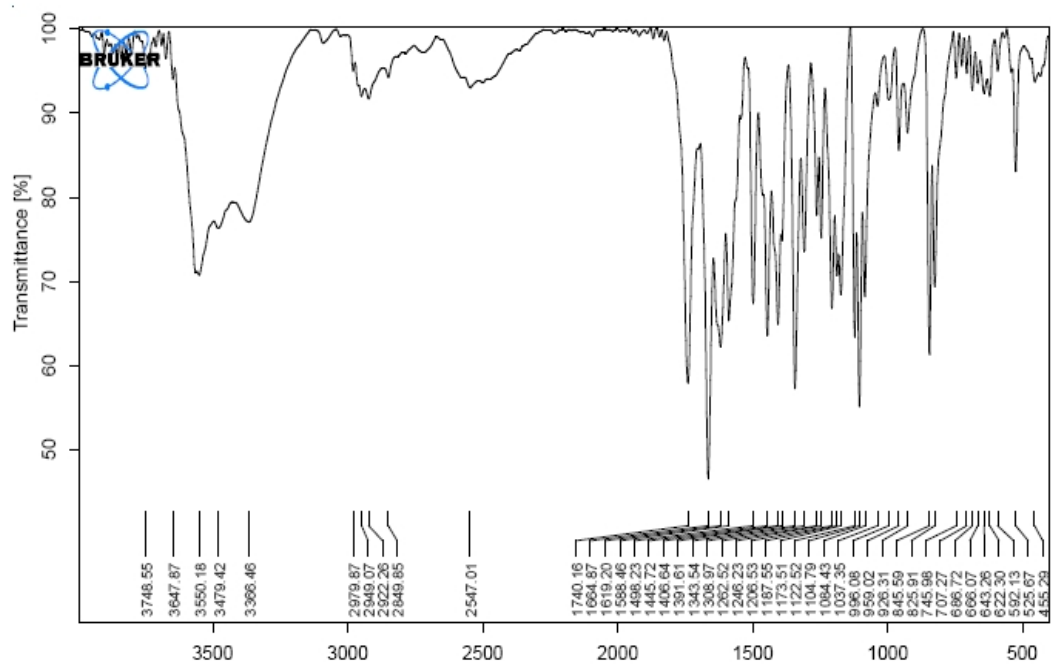

Figure S7. IR spectra of chaetosemin A



THERMO ELECTRON ~ VISIONpro SOFTWARE V4.10

|               |                |                |            |
|---------------|----------------|----------------|------------|
| Operator Name | (None Entered) | Date of Report | 2013-7-27  |
| Department    | (None Entered) | Time of Report | 19:15:28下午 |
| Organization  | (None Entered) |                |            |
| Information   | (None Entered) |                |            |

Scan Graph

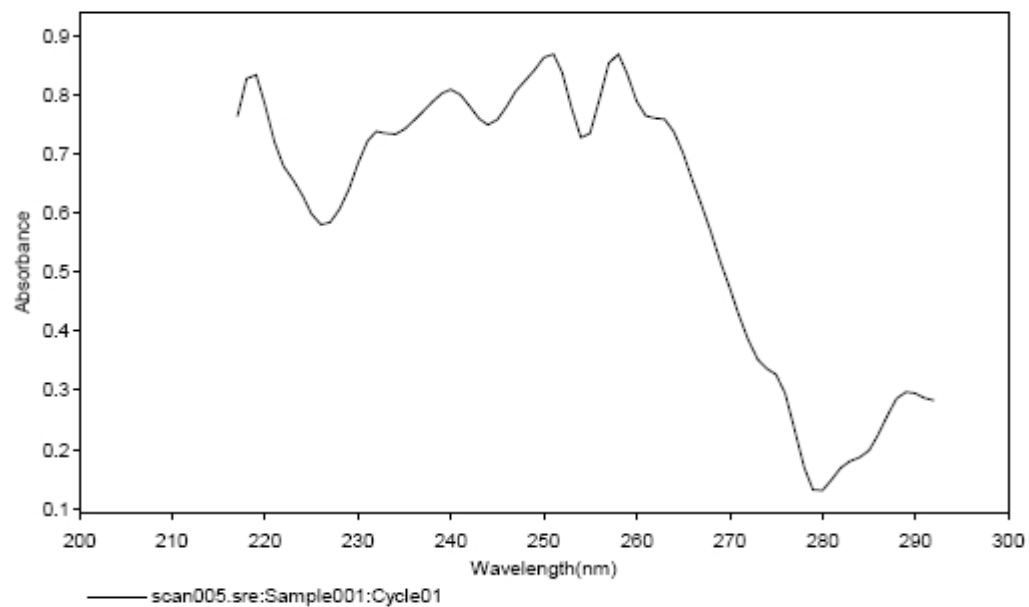

Figure S8. UV spectra of chaetosemin A

**Table S1. Crystal data and structure refinement for chaetosemin A**

|                                             |                                                                   |
|---------------------------------------------|-------------------------------------------------------------------|
| Empirical formula                           | C <sub>15</sub> H <sub>16</sub> O <sub>7</sub> S·H <sub>2</sub> O |
| Formula weight                              | 358.35                                                            |
| Temperature (K)                             | 298(2)                                                            |
| Wavelength (Å)                              | 0.71073                                                           |
| Crystal system                              | Orthorhombic                                                      |
| Space group                                 | P2(1)2(1)2(1)                                                     |
| Unit cell dimensions                        |                                                                   |
| <i>a</i> (Å)                                | 4.5675(5)                                                         |
| <i>b</i> (Å)                                | 7.6532(8)                                                         |
| <i>c</i> (Å)                                | 45.491(3)                                                         |
| $\alpha$ (°)                                | 90                                                                |
| $\beta$ (°)                                 | 90                                                                |
| $\gamma$ (°)                                | 90                                                                |
| Volume (Å <sup>3</sup> )                    | 1590.18(26)                                                       |
| <i>Z</i>                                    | 4                                                                 |
| Calculated density (mg/m <sup>3</sup> )     | 1.497                                                             |
| Absorption coefficient (mm <sup>-1</sup> )  | 0.245                                                             |
| F(0 0 0)                                    | 752                                                               |
| Crystal size (mm)                           | 0.42 × 0.30 × 0.28                                                |
| $\theta$ Range (°)                          | 2.808-22.65                                                       |
| Limiting indices                            |                                                                   |
| <i>h</i>                                    | -5-5                                                              |
| <i>k</i>                                    | -8-9                                                              |
| <i>l</i>                                    | -53-39                                                            |
| Reflections collected                       | 7980                                                              |
| Independent reflections                     | 2790[R <sub>int</sub> = 0.0434, R <sub>sigma</sub> = 0.0530]      |
| Data/restraints/parameters                  | 2790/0/219                                                        |
| Goodness-of-fit on F <sup>2</sup>           | 1.038                                                             |
| Final R indexes [I >= 2σ (I)]               | R <sub>1</sub> = 0.0525, wR <sub>2</sub> = 0.1052                 |
| Final R indexes [all data]                  | R <sub>1</sub> = 0.0680, wR <sub>2</sub> = 0.1110                 |
| Largest diff. peak/hole / e Å <sup>-3</sup> | 0.210/-0.213                                                      |

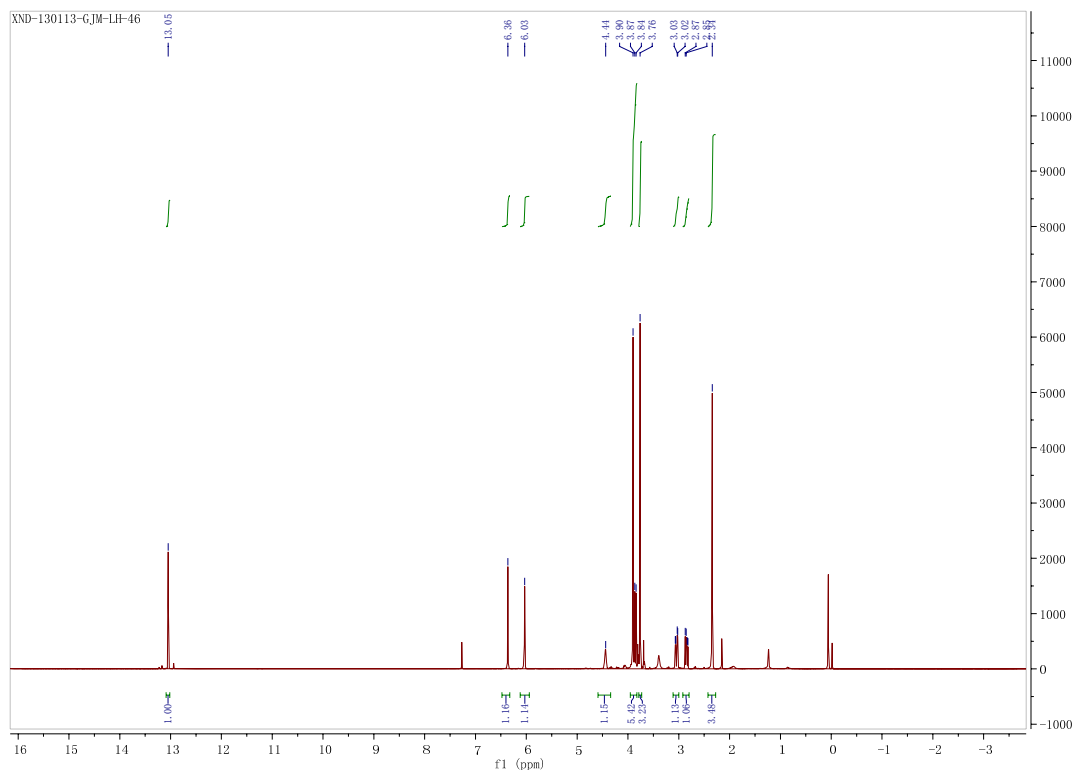

**Figure S9.**  $^1\text{H}$  spectra of chaetoseminBin  $\text{CDCl}_3$

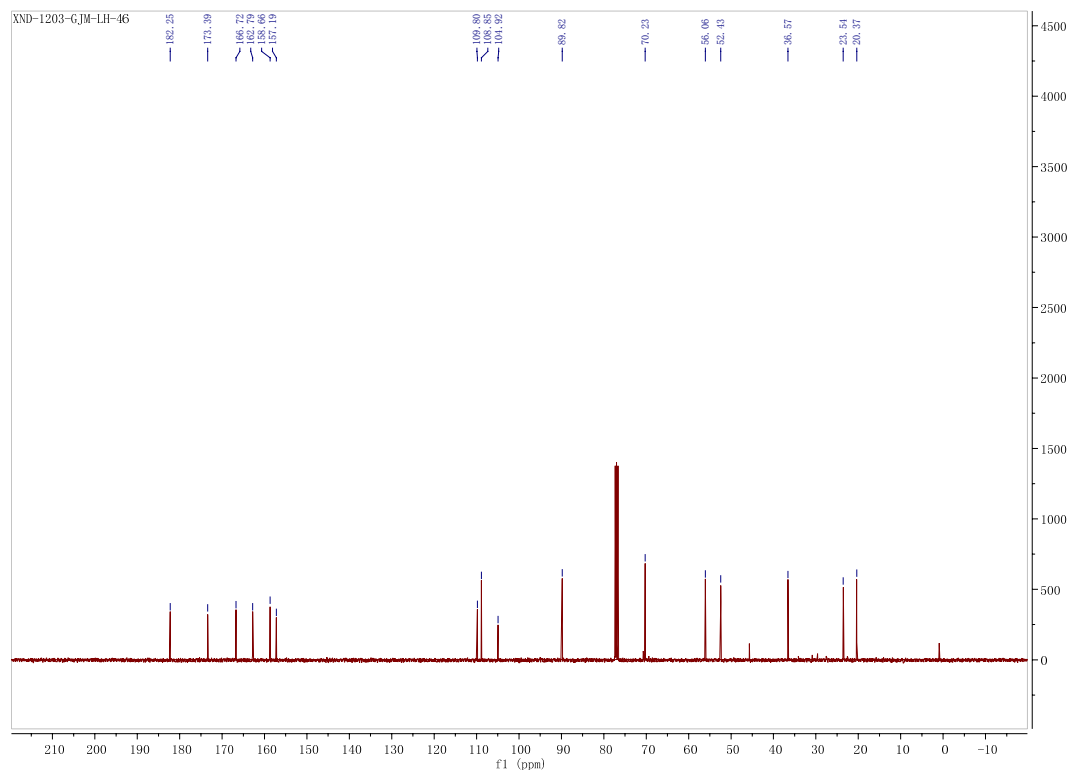

Figure S10.  $^{13}\text{C}$  spectra of chaetoseminBin  $\text{CDCl}_3$

Data File: D:\分子生物学\2013-07-26\cd\_2\_LH-46\_22.tol

| Elem. | Val. | Min. | Max. |
|-------|------|------|------|-------|------|------|------|-------|------|------|------|-------|------|------|------|-------|------|------|------|
| H     | 1    | 0    | 200  | N     | 3    | 0    | 0    | P     | 3    | 0    | 0    | Sr    | 1    | 0    | 0    |       |      |      |      |
| B     | 3    | 0    | 0    | O     | 2    | 0    | 50   | S     | 2    | 0    | 1    | I     | 3    | 0    | 0    |       |      |      |      |
| C     | 4    | 0    | 100  | F     | 1    | 0    | 0    | Cl    | 1    | 0    | 0    |       |      |      |      |       |      |      |      |

Error Margin (ppm): 20  
 HC Ratio: unlimited  
 Max Isotope: all  
 MSn Iso RI (%): 75.00

DBE Range: 0.0 - 30.0  
 Apply N Rule: no  
 Isotope RI (%): 1.00  
 MSn Logic Mode: OR

Electron Ion: both  
 Use MSn Info: yes  
 Isotope Res: 10000  
 Max Results: 500

Event#: 1 MS(E+) Rel. Time: 0.423 -> 0.650 Scan#: 66 -> 133

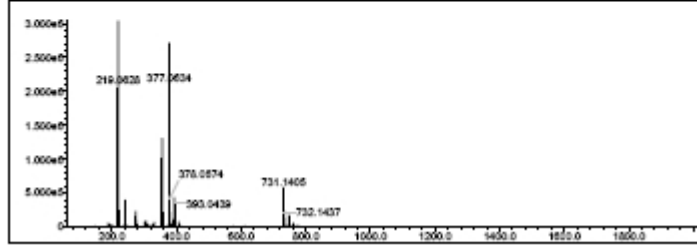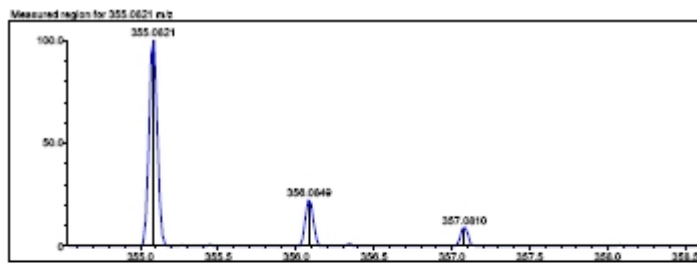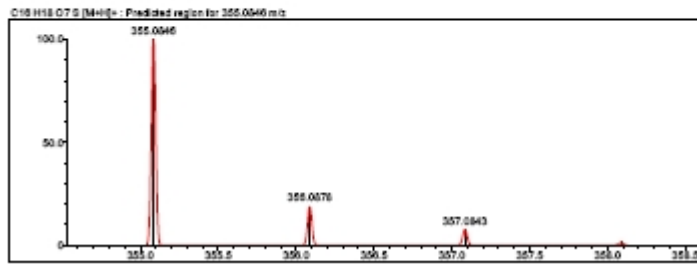

| Rank | Score | Ion                | Formula (M) | Pred. m/z | Mass. m/z | Df. (mDa) | CF. (ppm) | Isol  | DBE |
|------|-------|--------------------|-------------|-----------|-----------|-----------|-----------|-------|-----|
| 1    | 53.81 | [M+H] <sup>+</sup> | C18H16O7S   | 355.0646  | 355.0621  | -2.5      | -7.04     | 77.31 | 0.0 |

Figure S11.HRESIMS spectra of chaetoseminB

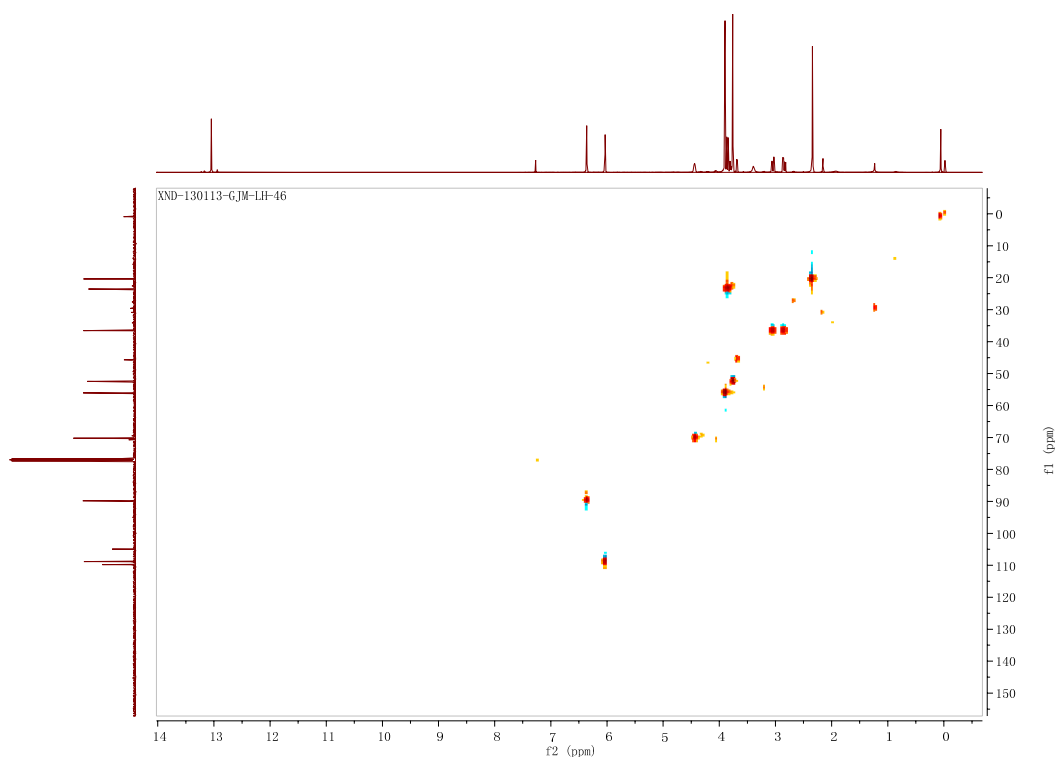

**Figure S12. HSQC spectra of chaetoseminB**

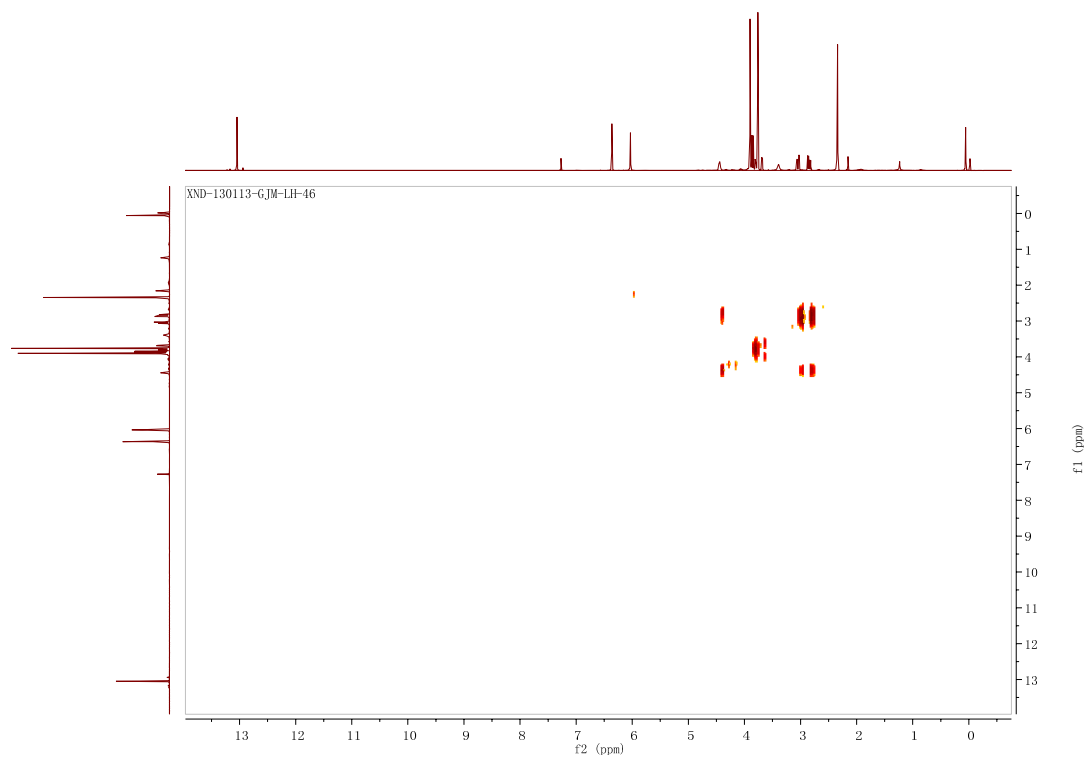

**Figure S13. COSY spectra of chaetoseminB**

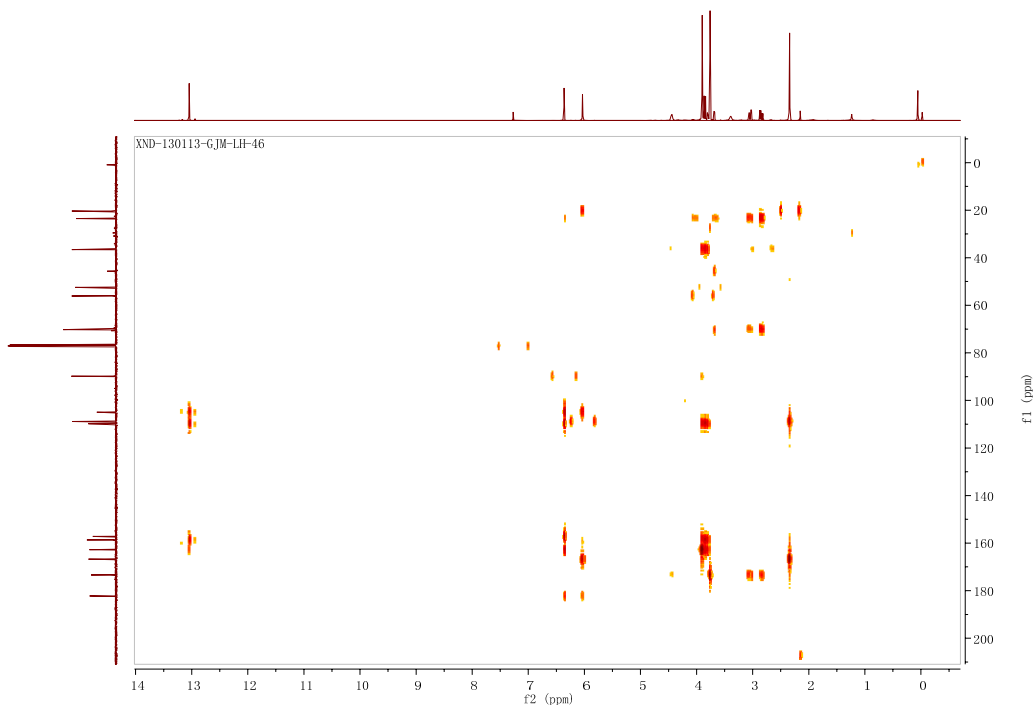

**Figure S14. HMBC spectra of chaetoseminB**



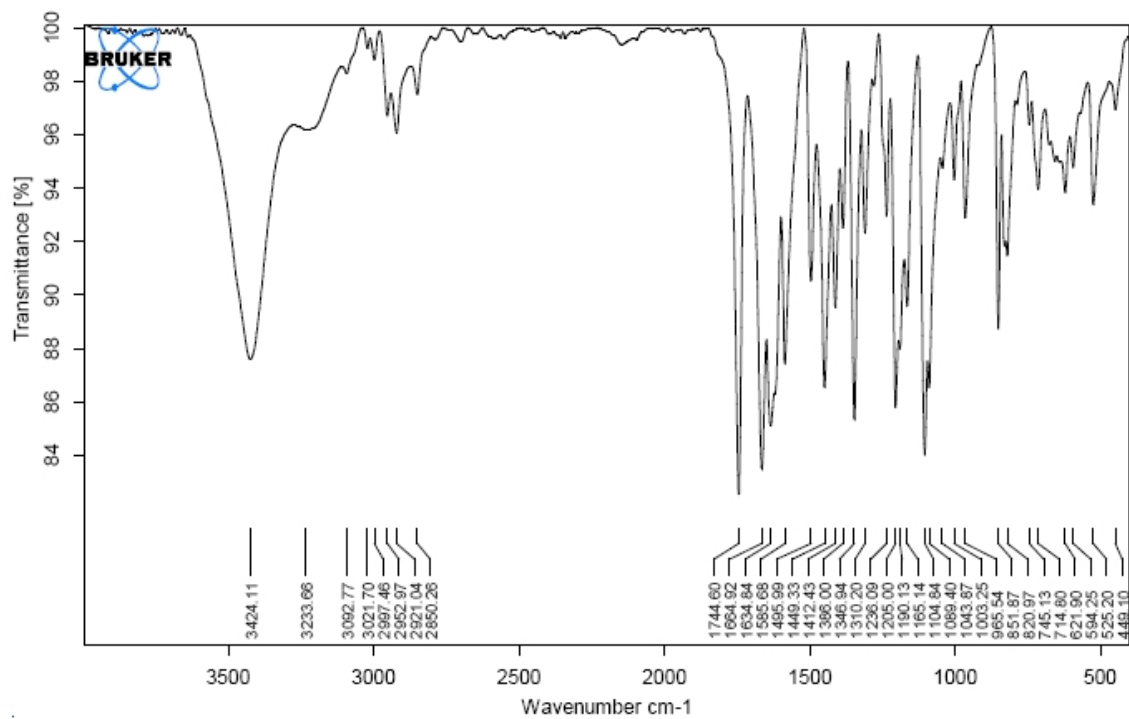

Figure S15. IR spectra of chaetoseminB

THERMO ELECTRON ~ VISIONpro SOFTWARE V4.10

Operator Name (None Entered)      Date of Report 2013-7-27  
Department (None Entered)      Time of Report 19:36:08下午  
Organization (None Entered)  
Information (None Entered)

Scan Graph

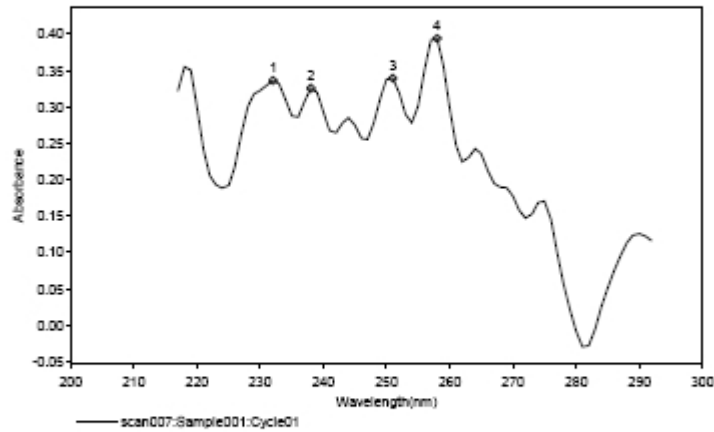

Results Table - scan007,Sample001,Cycle01

| nm          | A    | Peak Pick Method             |
|-------------|------|------------------------------|
| 232.00      | .336 | Find 8 Peaks Above -3.0000 A |
| 238.00      | .325 | Start Wavelength 200.00 nm   |
| 251.00      | .339 | Stop Wavelength 300.00 nm    |
| 258.00      | .394 | Sort By Wavelength           |
| Sensitivity | Auto |                              |

Figure S16. UV spectra of chaetoseminB

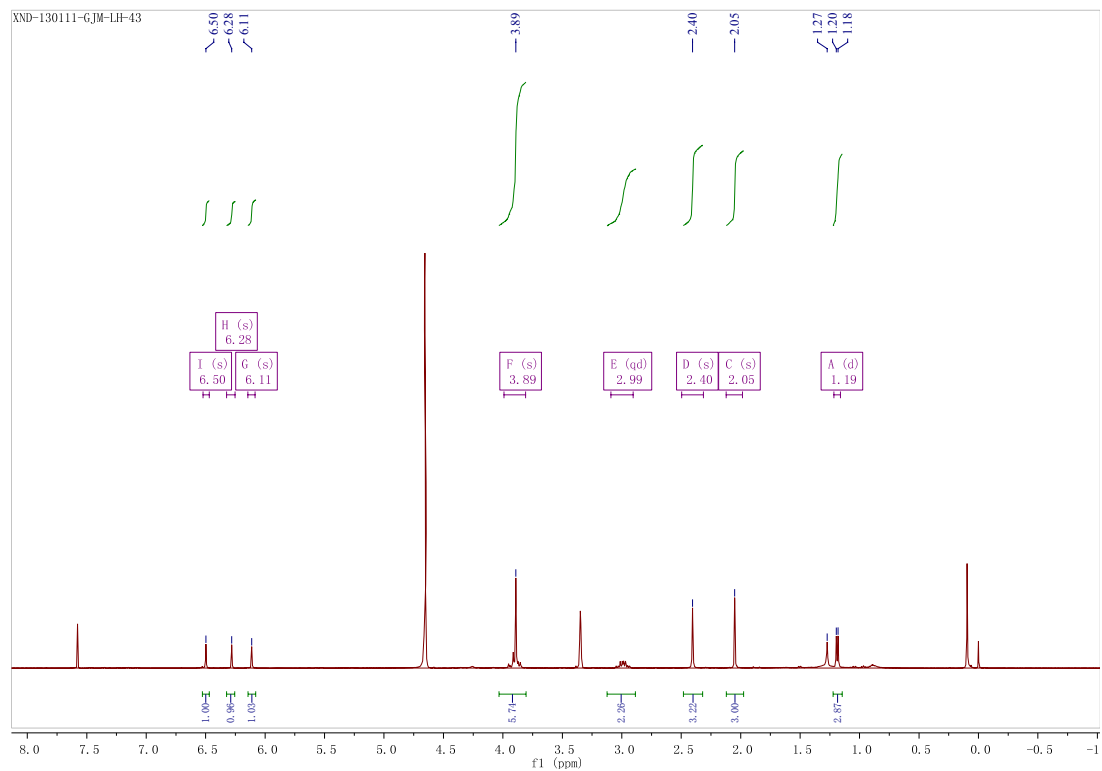

**Figure S17.  $^1\text{H}$  spectra of chaetoseminCin MeOD**

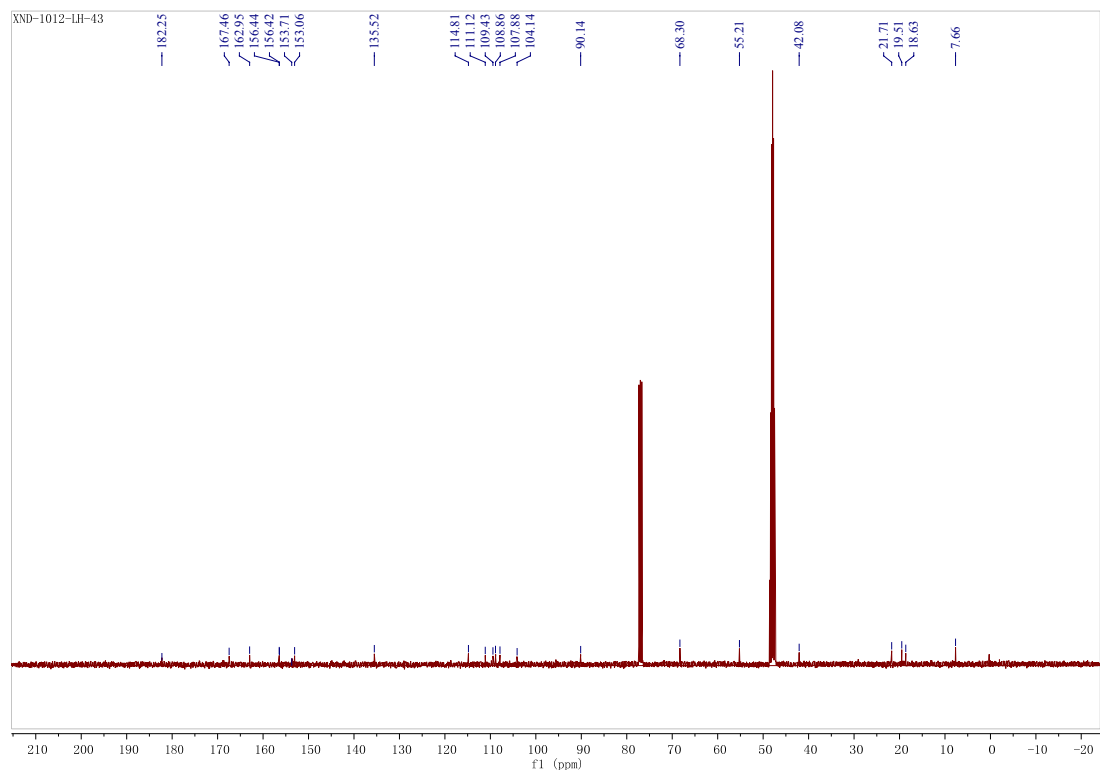

Figure S18.  $^{13}\text{C}$  spectra of chaetoseminCin MeOD

Data File: D:\分子毒理学\2013-07-29\ca2\_LH43\_21.tcd

| Elem | Val | Min | Max | Use Adjust |
|------|-----|-----|-----|------|-----|-----|-----|------|-----|-----|-----|------|-----|-----|-----|------------|
| H    | 1   | 0   | 300 | H    | 3   | 0   | 0   | P    | 3   | 0   | 0   | Br   | 1   | 0   | 0   | H          |
| B    | 3   | 0   | 0   | O    | 2   | 0   | 50  | S    | 2   | 0   | 1   | I    | 3   | 0   | 0   |            |
| C    | 4   | 0   | 100 | F    | 1   | 0   | 0   | Cl   | 1   | 0   | 0   |      |     |     |     |            |

Error Margin (ppm): 20  
 NC Ratio: unlimited  
 Max Isotopes: all  
 MSn Iso RI (%): 75.00  
 OBE Range: 0.0 - 30.0  
 Apply H Rule: no  
 Isotope RI (%): 1.00  
 MSn Logic Mode: OR  
 Electron Ionv: both  
 Use MSn Info: yes  
 Isotope Rat: 10000  
 Max Results: 100

Event#: 3 MS(E-) Ret. Time: 0.412 -> 0.723 Scan#: 66 -> 151

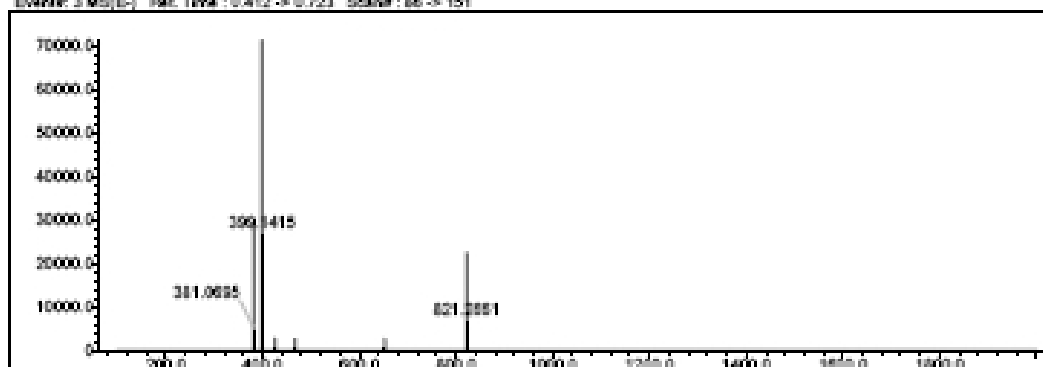

Measured region for 399.1415 m/z

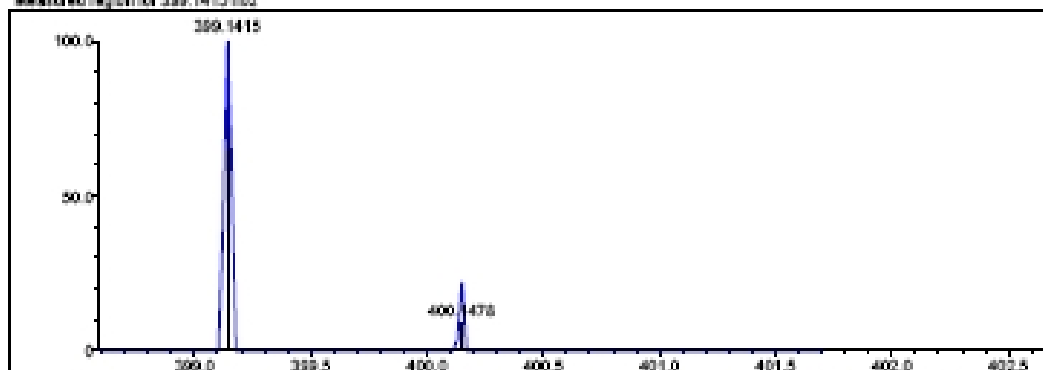

C22 H24 O7 (M-H)- : Predicted region for 399.1449 m/z

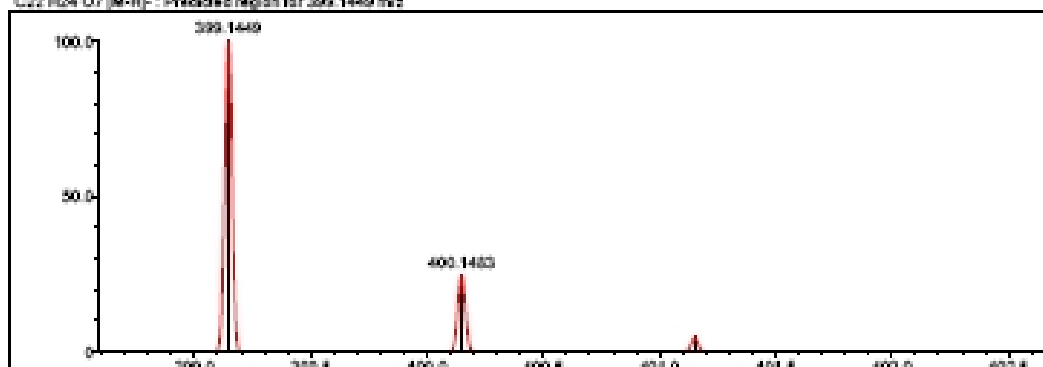

| Rank | Score | Ion    | Formula (M) | Pred. m/z | Mass. m/z | CF (mDa) | CF (ppm) | Isr   | OBE  |
|------|-------|--------|-------------|-----------|-----------|----------|----------|-------|------|
| 1    | 28.75 | (M-H)- | C22 H24 O7  | 399.1449  | 399.1415  | -3.4     | -8.52    | 52.48 | 11.0 |

Figure S19.HRESIMS spectra of chaetoseminC

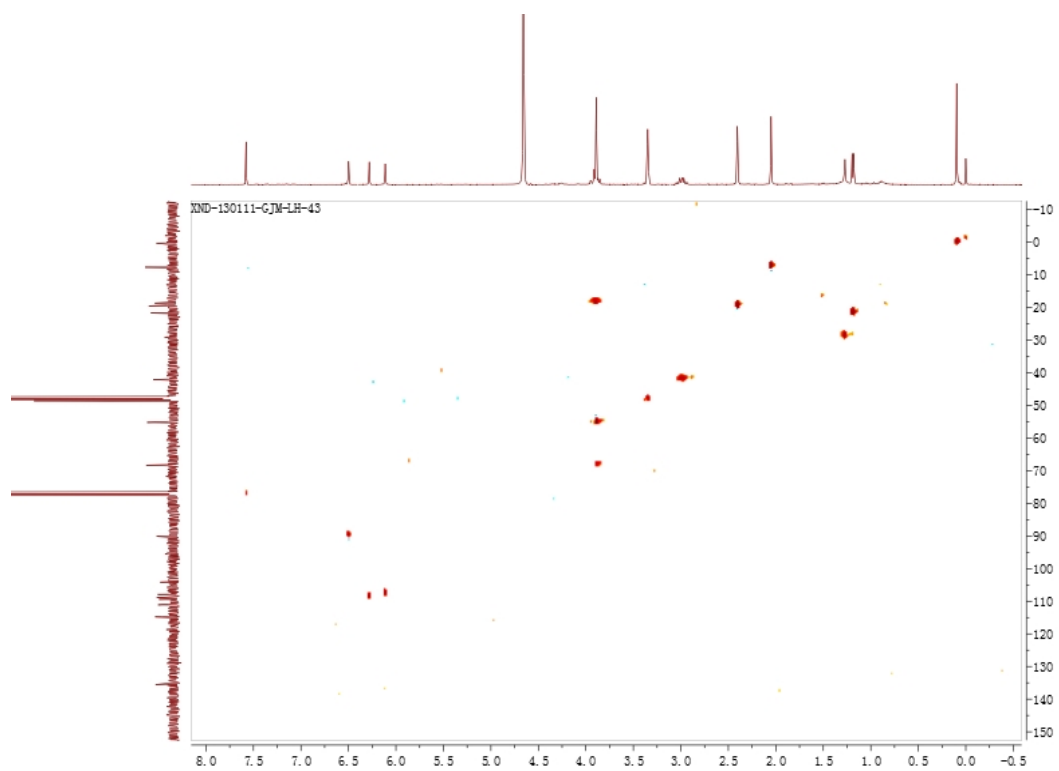

**Figure S20. HSQC spectra of chaetoseminC**

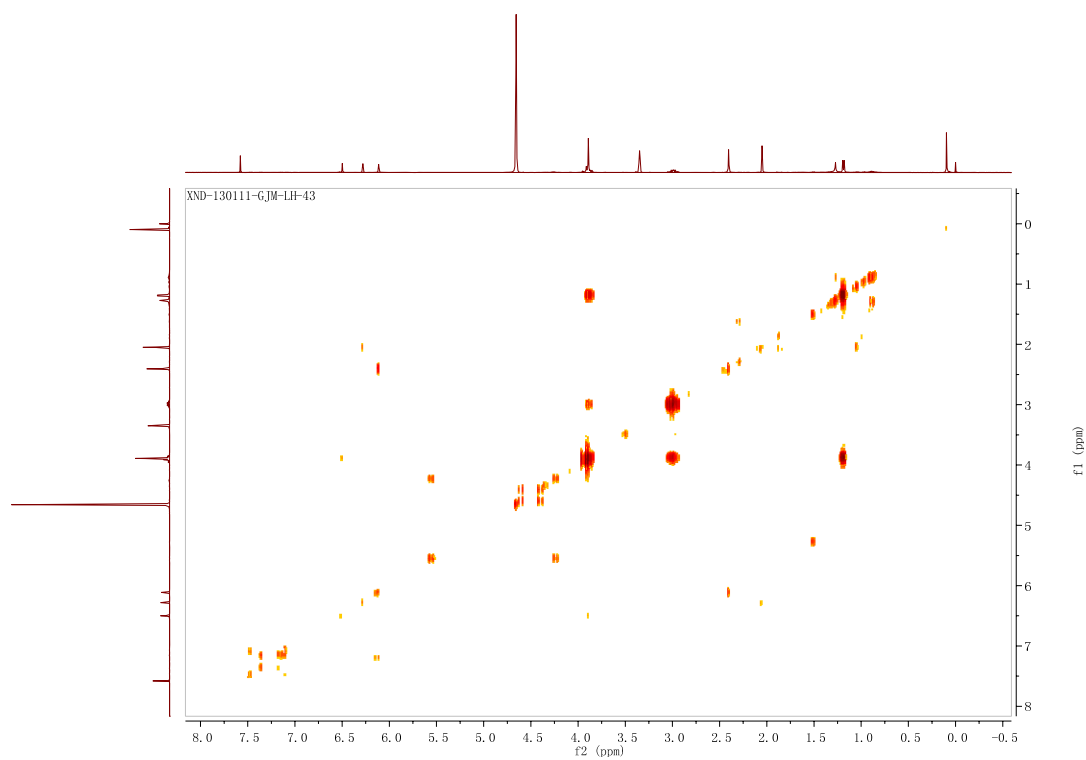

**Figure S21. COSY spectra of chaetoseminC**

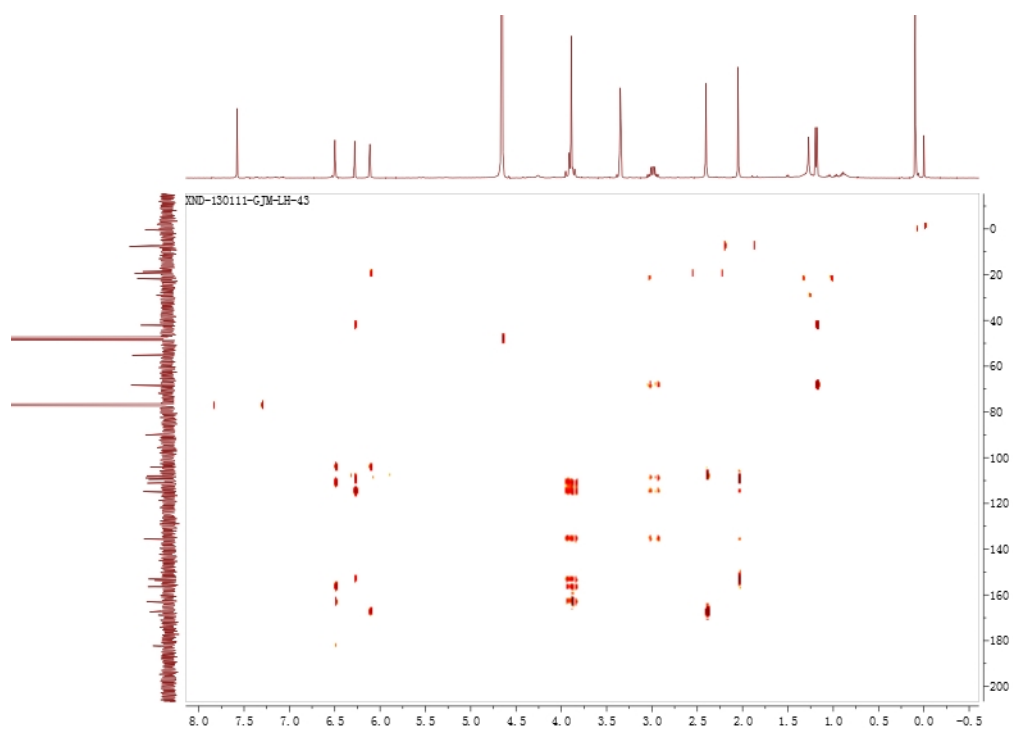

**Figure S22. HMBC spectra of chaetoseminC**



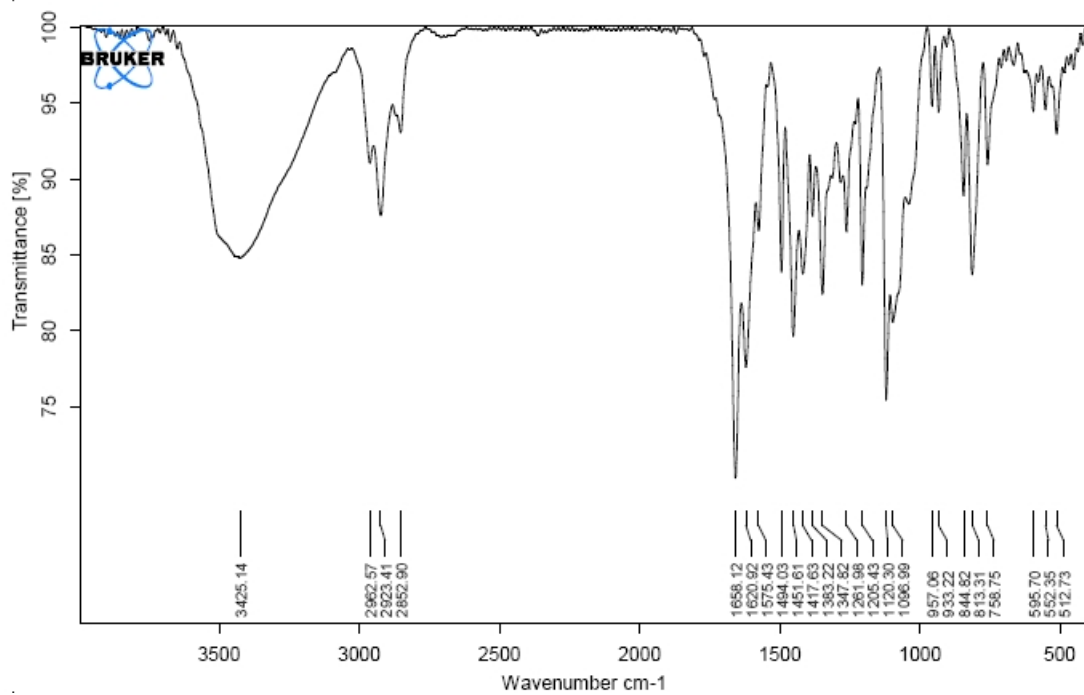

**Figure S23. IR spectra of chaetoseminC**

THERMO ELECTRON ~ VISIONpro SOFTWARE V4.10

Operator Name (None Entered)      Date of Report    2013-7-27  
Department (None Entered)        Time of Report    19:26:04下午  
Organization (None Entered)  
Information (None Entered)

Scan Graph

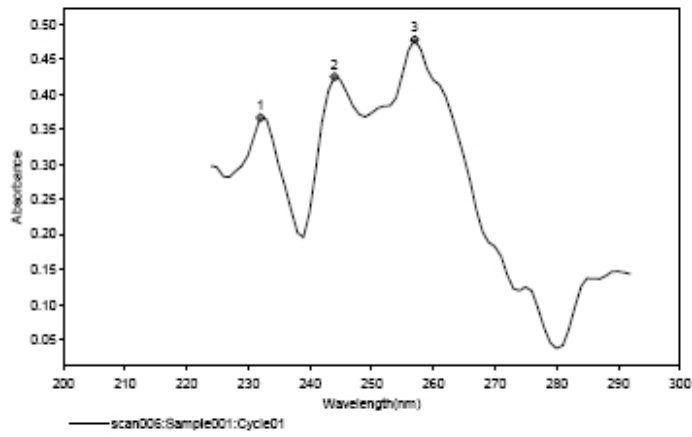

Results Table - c:\can008.srs, Sample001, Cycle01

| nm     | A    | Peak Pick Method             |
|--------|------|------------------------------|
| 232.00 | .367 | Find 8 Peaks Above -3.0000 A |
| 244.00 | .426 | Start Wavelength 200.00 nm   |
| 257.00 | .479 | Stop Wavelength 300.00 nm    |
|        |      | Sort By Wavelength           |

Sensitivity    Auto

Figure S24. UV spectra of chaetoseminC

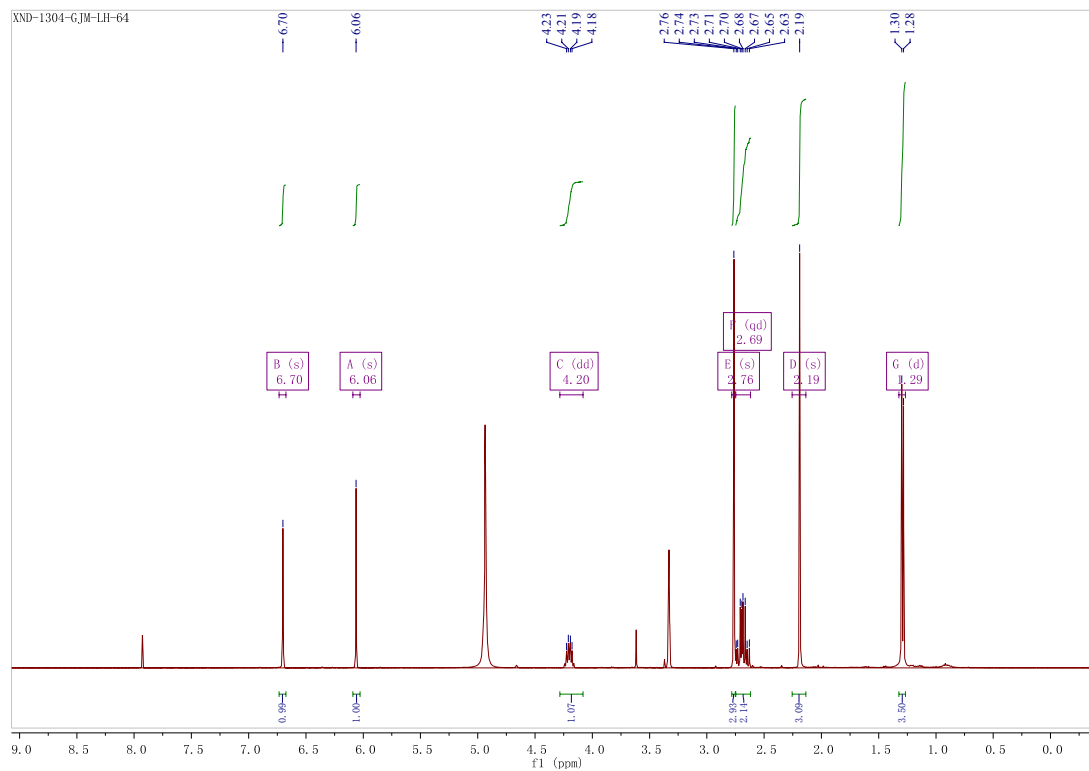

Figure S25.  $^1\text{H}$  spectra of chaetoseminDin MeOD

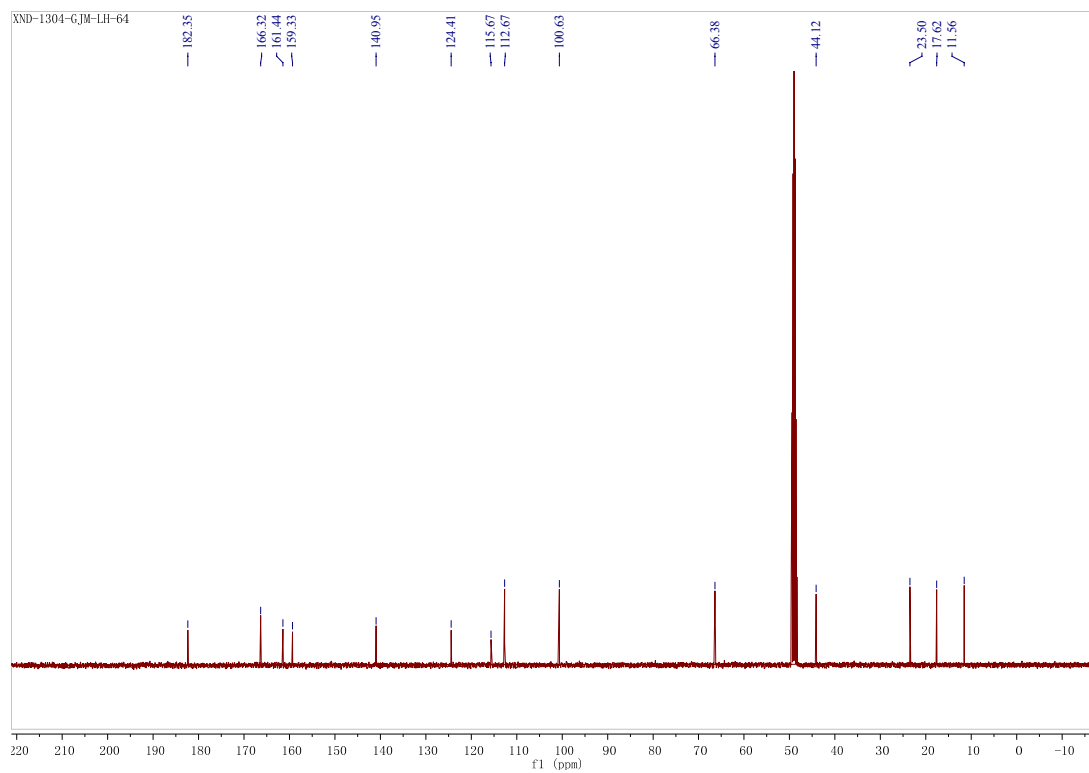

**Figure S26.**  $^{13}\text{C}$  spectra of chaetoseminDin MeOD

Data File: D:\分子量测定\2013-07-29\col-2\_LH-64\_25.fcd

| Elem | Val | Min | Max | Use Adduct |
|------|-----|-----|-----|------|-----|-----|-----|------|-----|-----|-----|------|-----|-----|-----|------------|
| H    | 1   | 0   | 200 | N    | 3   | 0   | 0   | P    | 3   | 0   | 0   | Br   | 1   | 0   | 0   | H          |
| S    | 3   | 0   | 0   | O    | 2   | 0   | 50  | S    | 2   | 0   | 1   | I    | 3   | 0   | 0   |            |
| C    | 4   | 100 | 100 | F    | 1   | 0   | 0   | Cl   | 1   | 0   | 0   | Q    | 0   | 0   | 0   |            |

Error Margin (ppm): 20  
 IIC Ratio: unlimited  
 Max Isotopes: all  
 MSn Ino RI (%): 75.00  
 DBE Range: 0.0 - 30.0  
 Apply N Rule: no  
 Isotope RI (%): 1.00  
 MSn Logic Mode: OR  
 Electron Ion: both  
 Use MSn Info: yes  
 Isotope Rat: 10000  
 Max Results: 100

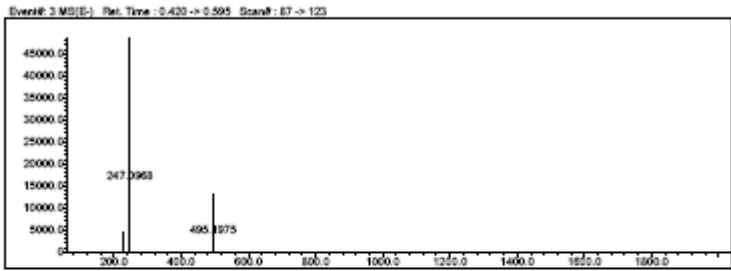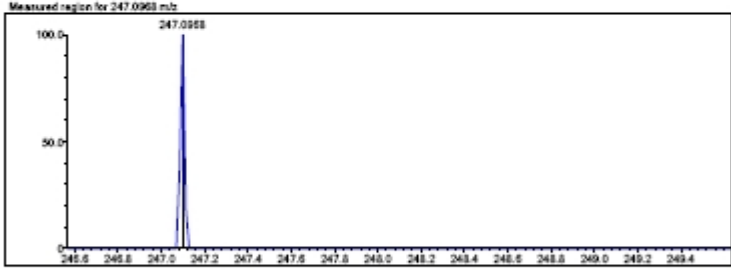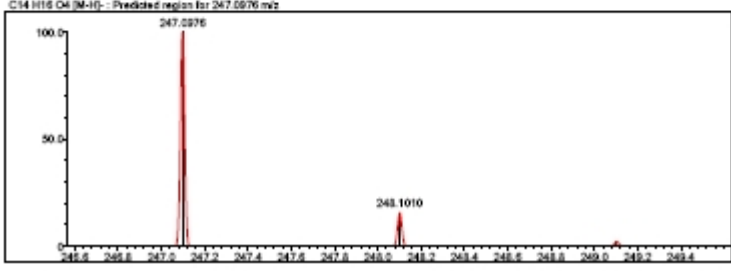

| Scan | Score | In    | Formula (M) | Pred. m/z | Mass. m/z | CV (mDa) | CV (ppm) | Is   | DBE |
|------|-------|-------|-------------|-----------|-----------|----------|----------|------|-----|
| 1    | 0.00  | [M-H] | C14 H16 O4  | 247.0976  | 247.0968  | -0.3     | -3.24    | 0.00 | 7.0 |

Figure S27.HRESIMS spectra of chaetoseminD

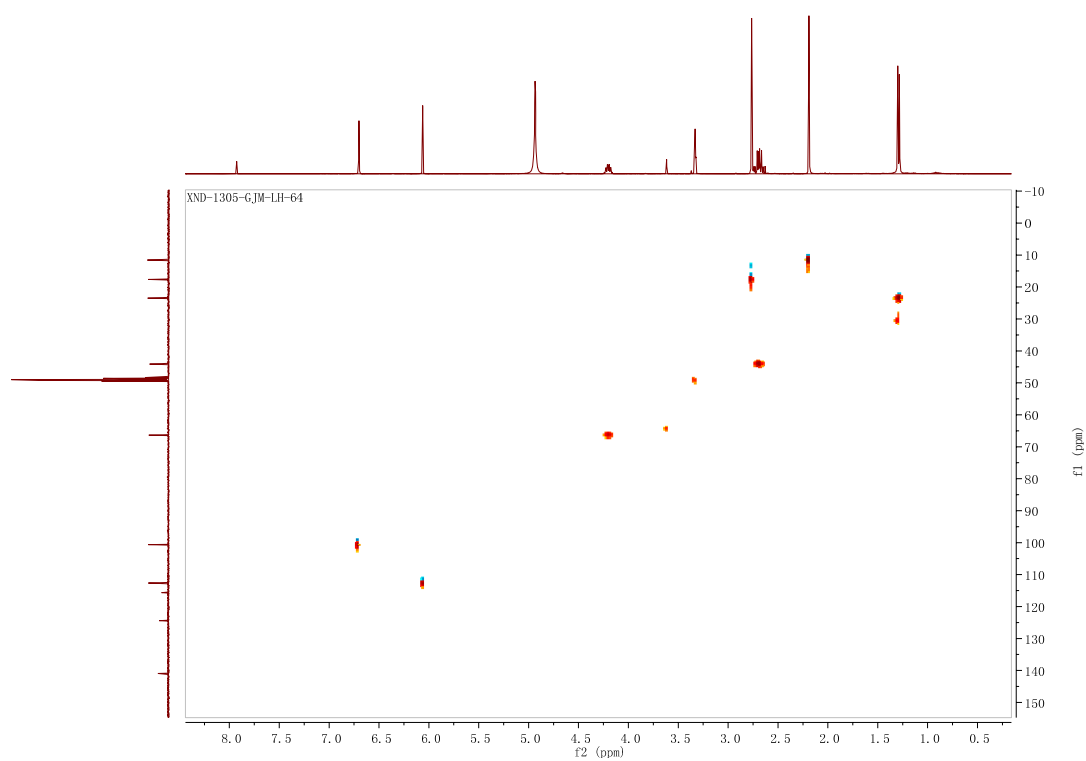

**Figure S28. HSQC spectra of chaetoseminD**

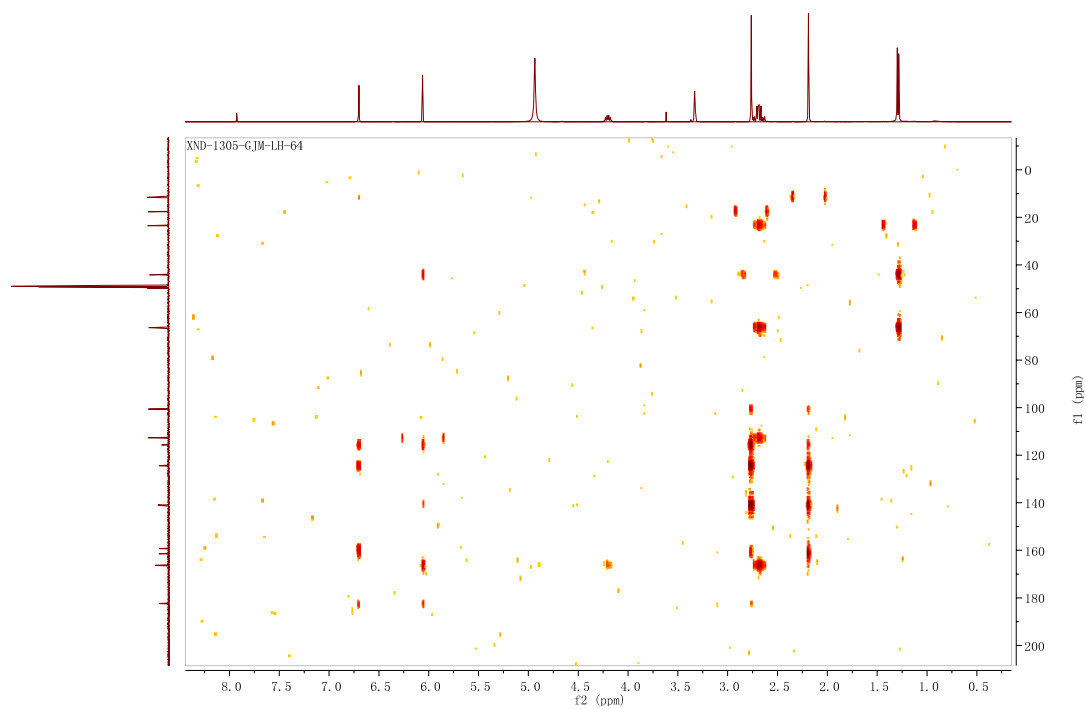

**Figure S29. HMBC spectra of chaetoseminD**

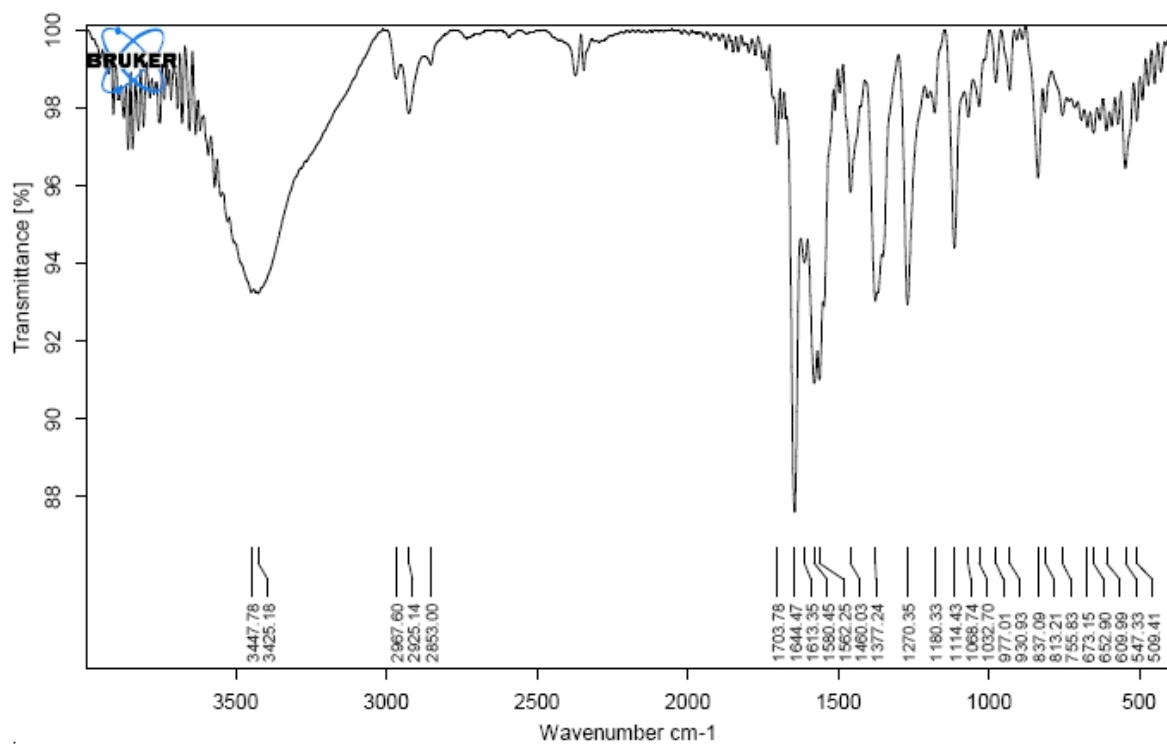

**Figure S30. IR spectra of chaetoseminD**



THERMO ELECTRON ~ VISIONpro SOFTWARE V4.10

Operator Name (None Entered)      Date of Report    2013-10-24  
Department (None Entered)        Time of Report    21:22:24下午  
Organization (None Entered)  
Information (None Entered)

Scan Graph

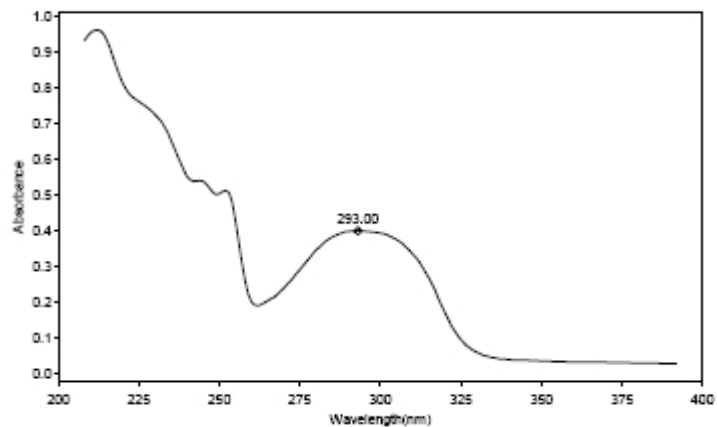

**Figure S31. UV spectra of chaetoseminD**



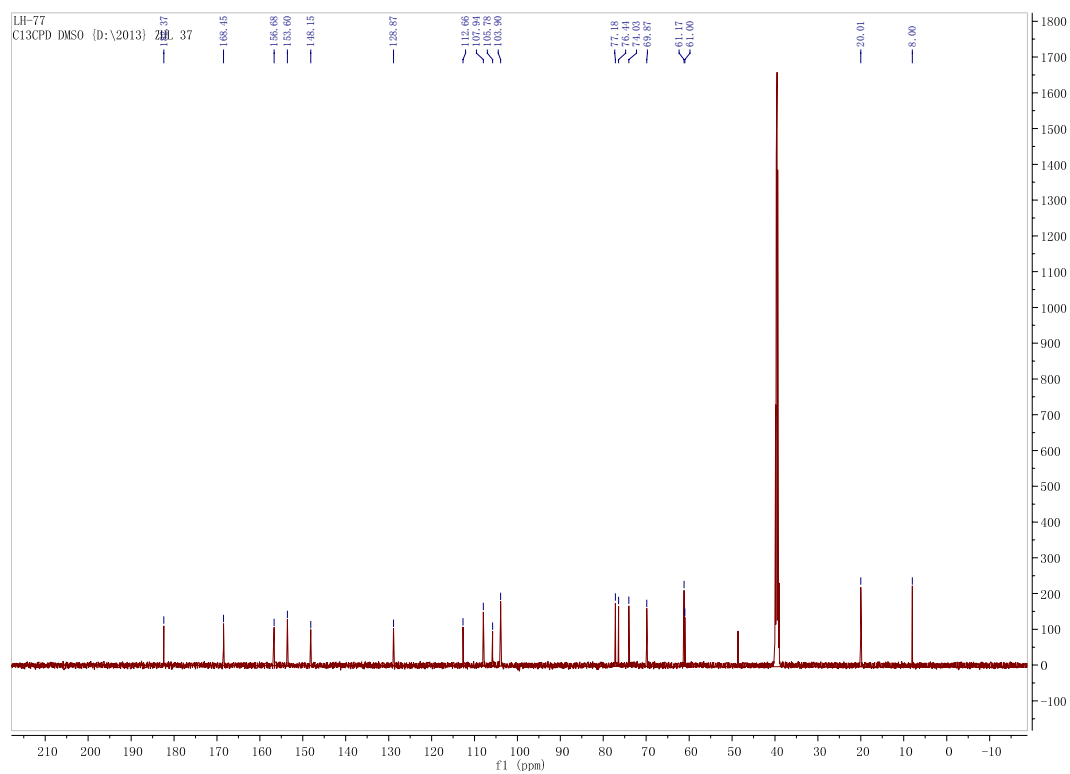

**Figure S33.** <sup>13</sup>C spectra of chaetoseminEin DMSO

Data File: C:\分子生物学\2014-01-12\2014-01-12 2 MS\_LH-77\_11.txt

| Elem | Val | Min | Max | Use Adduct |
|------|-----|-----|-----|------|-----|-----|-----|------|-----|-----|-----|------|-----|-----|-----|------------|
| H    | 1   | 0.0 | 200 | N    | 3   | 0   | 3   | P    | 3   | 0   | 0   | Br   | 1   | 0   | 0   | H          |
| S    | 3   | 0.0 | 0   | O    | 2   | 0   | 100 | S    | 2   | 0   | 0   | I    | 3   | 0   | 0   |            |
| C    | 4   | 0.0 | 100 | F    | 1   | 0   | 0   | Cl   | 1   | 0   | 1   |      |     |     |     |            |

Error Margin (ppm): 20  
 HC Ratio: 0.0 - 3.0  
 Max Isotopes: all  
 MSn Iso RI (%): 75.00

DBE Range: 0.0 - 30.0  
 Apply N Rule: yes  
 Isotope RI (%): 1.00  
 MSn Logic Mode: OR

Electron Ion: both  
 Use MSn Info: yes  
 Isotope Res: 10000  
 Max Results: 500

Event# 1 MS(E+) Rel. Time - 0.257 -> 0.588 - 0.715 -> 1.534 Scan# : 57 -> 125 - 157 -> 337

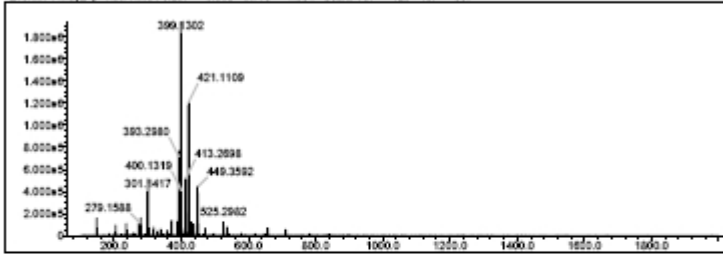

Measured region for 399.1302 m/z

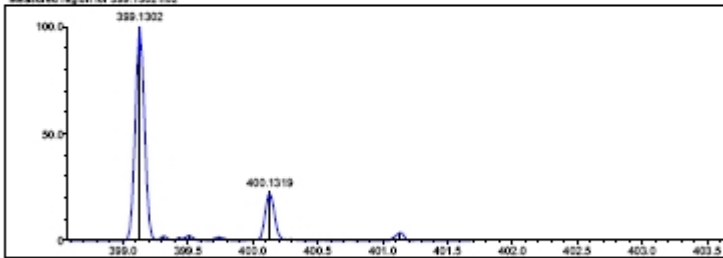

C18 H22 O10 (M+H)+ Predicted region for 399.1286 m/z

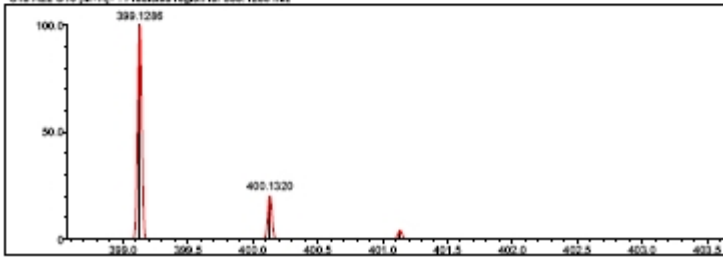

| Rank | Score | Ion                | Formula (M) | Prod. m/z | Mass. m/z | CV (m/z) | DF (ppm) | Tag   | DBE |
|------|-------|--------------------|-------------|-----------|-----------|----------|----------|-------|-----|
| 1    | 74.01 | [M+H] <sup>+</sup> | C18H22O10   | 399.1286  | 399.1302  | 1.6      | 4.01     | 60.00 | 8.0 |

Figure S34.HRESIMS spectra of chaetoseminE

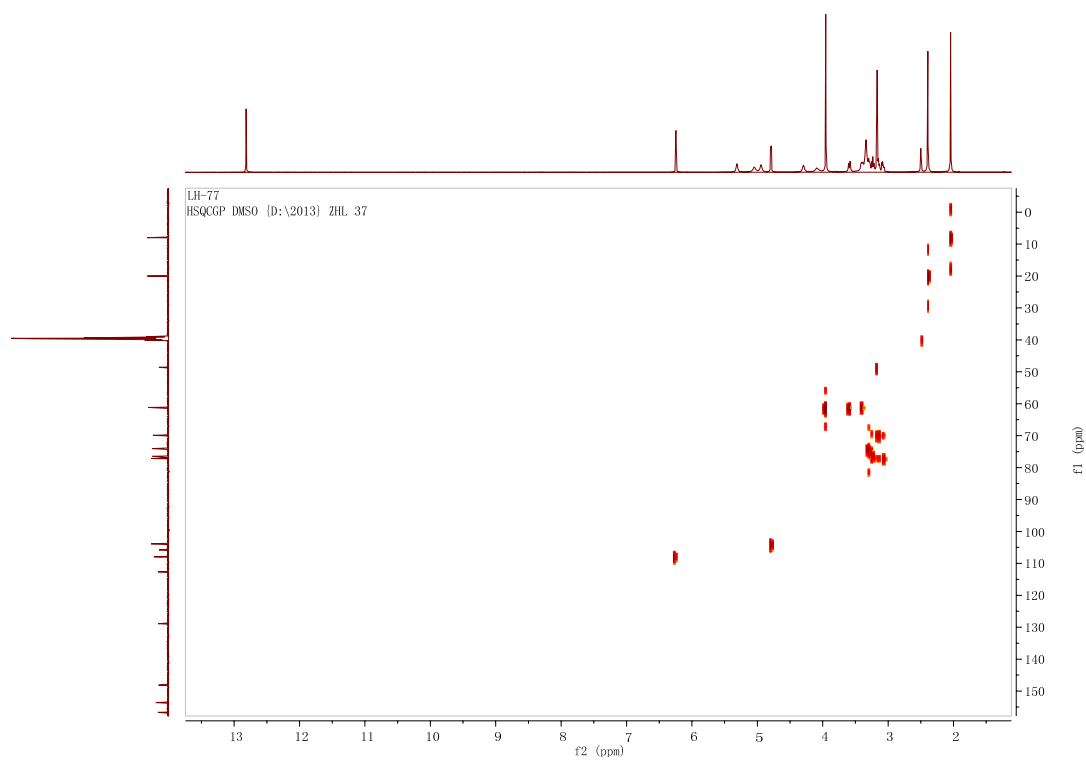

**Figure S35. HSQC spectra of chaetoseminE**

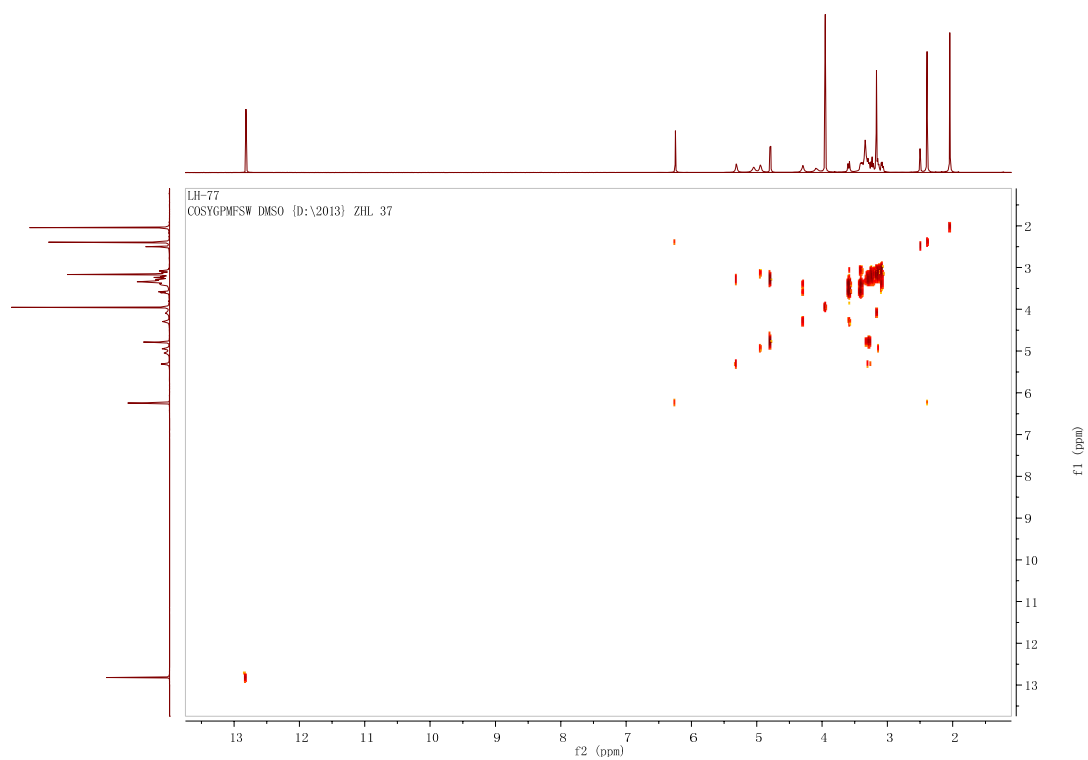

**Figure S36. COSY spectra of chaetoseminE**

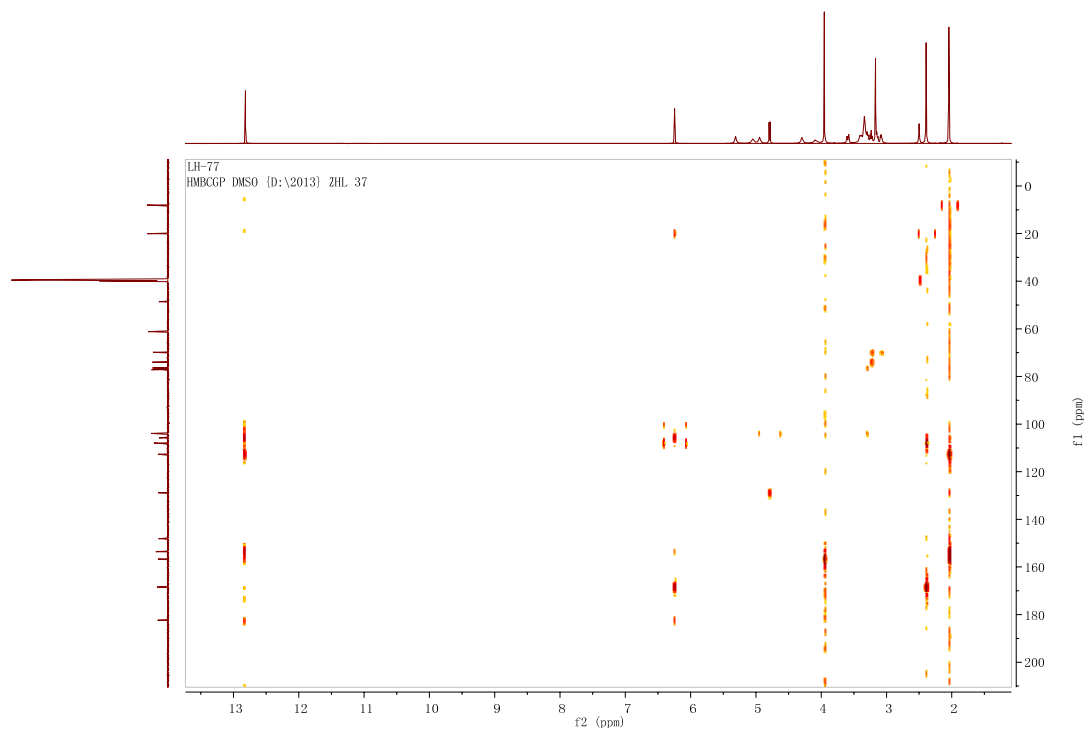

**Figure S37. HMBC spectra of chaetoseminE**

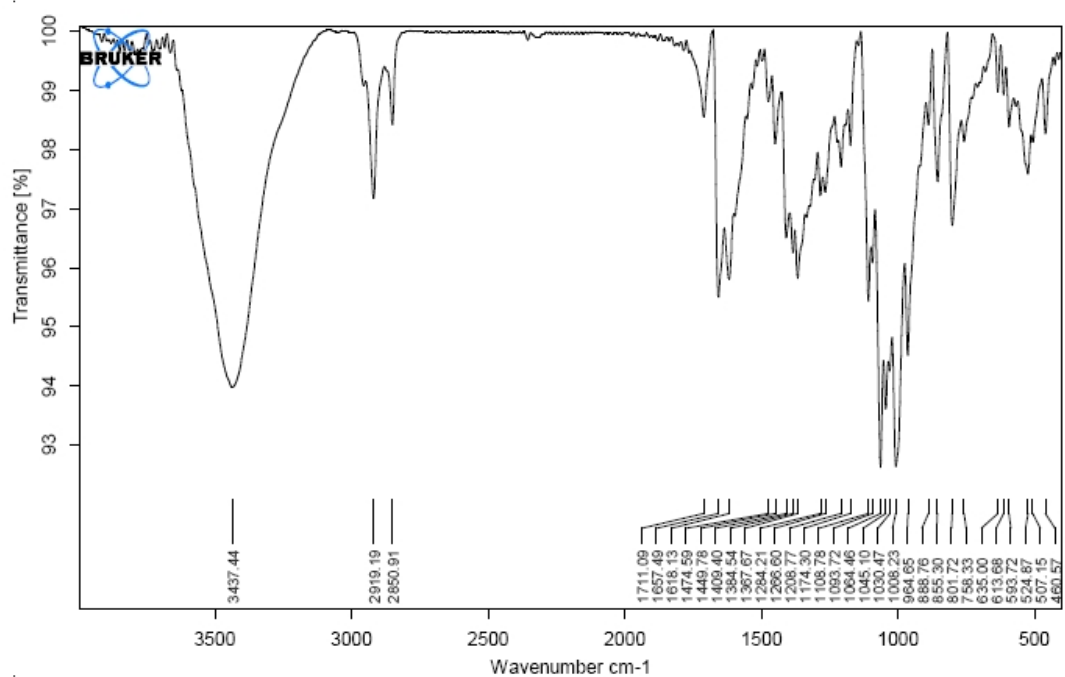

**Figure S38. IR spectra of chaetoseminE**



THERMO ELECTRON ~ VISIONpro SOFTWARE V4.10

|               |                |                |            |
|---------------|----------------|----------------|------------|
| Operator Name | (None Entered) | Date of Report | 2013-10-24 |
| Department    | (None Entered) | Time of Report | 21:47:24下午 |
| Organization  | (None Entered) |                |            |
| Information   | (None Entered) |                |            |

Scan Graph

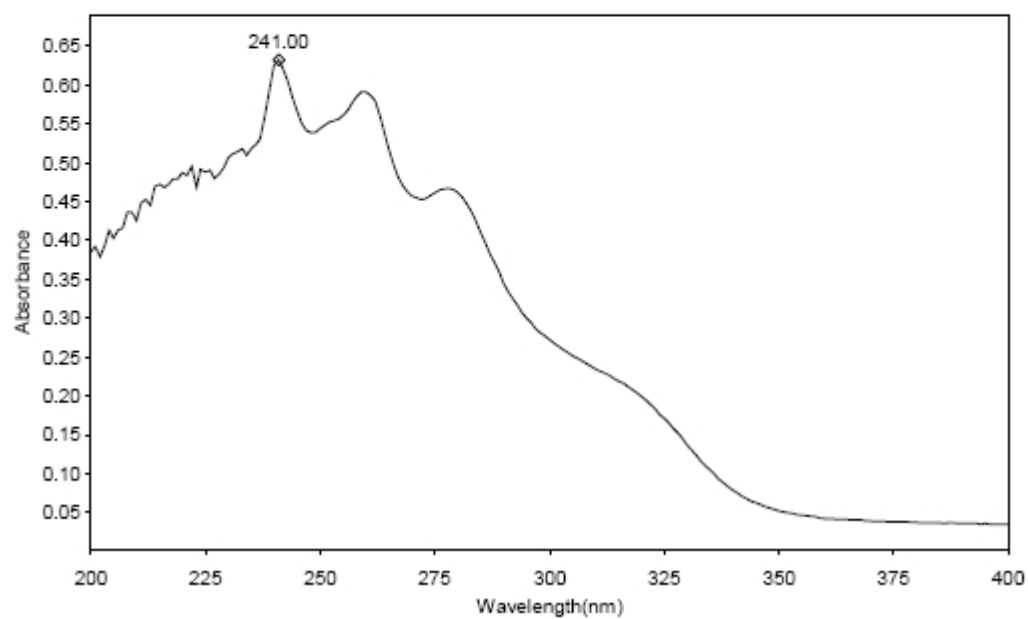

Figure S39. UV spectra of chaetoseminE

Compound **6**, white powder,ESI-MS (negative)  $m/z$  219.33[M-H]<sup>-</sup>, <sup>1</sup>H-NMR (400MHz, CDCl<sub>3</sub>)  $\delta$ 12.78(1H, s, 5-OH), 6.34(1H, s, H-8), 6.02(1H, s, H-3), 3.88(s, 3H, 7-OCH<sub>3</sub>), 2.34(s, 3H, 2-CH<sub>3</sub>), 2.08(s, 3H, 6-CH<sub>3</sub>); <sup>13</sup>C-NMR (100MHz, CDCl<sub>3</sub>)  $\delta$ 182.38(C-4), 166.29(C-2), 163.21(C-7), 158.36(C-5), 156.27(C-8a), 108.80(C-6), 108.77(C-3), 104.89(C-4a), 89.11(C-8), 55.79(7-OCH<sub>3</sub>), 20.39(2-CH<sub>3</sub>), 7.18(6-CH<sub>3</sub>);

Compound **7**, white powder,ESI-MS (negative)  $m/z$  249.33[M-H]<sup>-</sup>, <sup>1</sup>H-NMR (400MHz, CDCl<sub>3</sub>)  $\delta$ 13.03 (1H, s, 5-OH), 6.37(1H, s, H-8), 6.05(1H, s, H-3), 4.55(2H, s, CH<sub>2</sub>OCH<sub>3</sub>), 3.91(s, 3H, 7-OCH<sub>3</sub>), 3.41(3H, s, CH<sub>2</sub>OCH<sub>3</sub>), 2.36(s, 3H, 2-CH<sub>3</sub>); <sup>13</sup>C-NMR (100MHz, CDCl<sub>3</sub>)  $\delta$ 182.39(C-4), 166.59(C-2), 164.14(C-7), 160.5(C-5), 158.13(C-8a), 109.04(C-3), 108.88(C-6), 104.98(C-4a), 89.55(C-8), 61.54(CH<sub>2</sub>OCH<sub>3</sub>), 58.16(CH<sub>2</sub>OCH<sub>3</sub>), 56.12(7-OCH<sub>3</sub>), 20.39(2-CH<sub>3</sub>);

Compound **8**, white powder,ESI-MS (positive)  $m/z$  236.92 [M+H]<sup>+</sup>, <sup>1</sup>H-NMR (400MHz, C<sub>5</sub>D<sub>5</sub>N)  $\delta$ 13.78 (1H, s, 5-OH), 6.48(1H, s, H-8), 6.15(1H, s, H-3), 5.20(2H, s, CH<sub>2</sub>), 3.76(3H, s, 7-OCH<sub>3</sub>), 2.15(s, 3H, 2-CH<sub>3</sub>); <sup>13</sup>C-NMR (100MHz, C<sub>5</sub>D<sub>5</sub>N)  $\delta$  183.24(C-4), 167.73(C-2), 164.66(C-7), 160.51(C-5), 158.29(C-8a), 113.96(C-6), 109.35(C-3), 105.74(C-4a), 90.66(C-8), 56.42(7-OCH<sub>3</sub>), 52.47(CH<sub>2</sub>), 20.28(2-CH<sub>3</sub>);

Compound **9**, pale yellow powder,ESI-MS (negative)  $m/z$  205.42[M-H]<sup>-</sup>, <sup>1</sup>H-NMR (400MHz, CDCl<sub>3</sub>)  $\delta$ 13.04 (1H, s, 5-OH), 6.38(1H, s, H-8), 6.13(1H, s, H-3), 2.33(s, 3H, 2-CH<sub>3</sub>), 1.95(s, 3H, 6-CH<sub>3</sub>); <sup>13</sup>C-NMR (100MHz, CDCl<sub>3</sub>)  $\delta$ 181.73(C-4), 167.29(C-2), 162.00(C-7), 158.53(C-5), 155.38(C-8a), 107.84(C-3), 106.66(C-6), 103.06(C-4a), 92.77(C-8), 19.91(2-CH<sub>3</sub>), 7.32(6-CH<sub>3</sub>);

Compound **10**, white powder, ESI-MS (positive)  $m/z$  221.00[M+H]<sup>+</sup>, <sup>1</sup>H-NMR (400MHz, CDCl<sub>3</sub>)  $\delta$  12.77 (1H, s, 5-OH), 6.37(1H, s, H-6), 6.01(1H, s, H-3), 3.89(3H, s, 7-OCH<sub>3</sub>), 2.38(s, 3H, 2-CH<sub>3</sub>), 2.15(s, 3H, 8-CH<sub>3</sub>); <sup>13</sup>C-NMR (100MHz, CDCl<sub>3</sub>)  $\delta$  183.02(C-4), 166.79(C-2), 162.91(C-7), 160.15(C-5), 154.86(C-8a), 108.16(C-3), 104.54(C-4a), 103.63(C-8), 94.71(C-6), 55.94(7-OCH<sub>3</sub>), 20.55(2-CH<sub>3</sub>), 7.42(8-CH<sub>3</sub>);

Compound **11**, white powder, ESI-MS (negative)  $m/z$  368.25[M-H]<sup>-</sup>, <sup>1</sup>H-NMR (400MHz, CDCl<sub>3</sub>:CD<sub>3</sub>OD = 1:1)  $\delta$  6.37 (1H, s, H-8), 5.99 (1H, s, H-3), 4.33 (2H, s, H-1'), 3.99 (3H, s, 7-OCH<sub>3</sub>), 3.82 (2H, s, H-4'), 3.58 (2H, s, H-3'), 2.27 (3H, s, 2-CH<sub>3</sub>), 1.82 (3H, s, H-7'); <sup>13</sup>C NMR (100 MHz, CDCl<sub>3</sub>)  $\delta$  182.16(C-4), 171.36(C-6'), 167.64(C-2), 163.42(C-7), 159.35(C-5), 158.39(C-8a), 108.68(C-3), 104.64(C-4a), 99.78(C-6), 90.39(C-8), 56.18(7-OCH<sub>3</sub>), 52.07(C-3'), 32.57(C-4'), 22.21(C-7'), 20.06 (2-CH<sub>3</sub>);

Compound **12**, white powder, ESI-MS (negative)  $m/z$  357.42[M-H]<sup>-</sup>, <sup>1</sup>H-NMR (400MHz, CDCl<sub>3</sub>)  $\delta$  12.82 (1H, s, 5-OH), 6.32(1H, s, H-8), 6.01(1H, s, H-3), 5.20(1H, s, H-4'), 4.40(1H, s, H-7'), 3.84(3H, s, 7-OCH<sub>3</sub>), 2.74(1H, m, H-2'), 2.64(1H, m, H-1'a), 2.90(1H, m, H-1'b), 2.35(3H, s, 2-CH<sub>3</sub>), 2.30 (2H, m, H-6'), 1.40(3H, d, 7'-CH<sub>3</sub>), 1.09(3H, d, 2'-CH<sub>3</sub>); <sup>13</sup>C-NMR (100MHz, CDCl<sub>3</sub>)  $\delta$  193.54(C-5'), 182.37 (C-4), 181.49(C-3'), 166.46 (C-2), 163.18(C-7), 158.97(C-5), 156.73(C-8a), 110.48 (C-6), 108.80 (C-3), 104.86 (C-4a), 102.40(C-4'), 89.29 (C-8), 75.35 (C-7'), 55.78(7-OCH<sub>3</sub>), 42.64(C-6'), 38.38(C-2'), 27.06 (C-1'), 20.34 (2-CH<sub>3</sub>), 20.27(C-8'), 17.14(2'-CH<sub>3</sub>);

Compound **13**, white powder, ESI-MS (negative)  $m/z$  357.42[M-H]<sup>-</sup>, <sup>1</sup>H-NMR (400MHz, CDCl<sub>3</sub>) δ 12.82 (1H, s, 5-OH), 6.32(1H, s, H-8), 6.01(1H, s, H-3), 5.09(1H, s, H-4'), 4.35(1H, s, H-7'), 3.84(3H, s, 7-OCH<sub>3</sub>), 2.74(1H, m, H-2'), 2.70, 2.95(2H, m, H-1'), 2.35(s, 3H, 2-CH<sub>3</sub>), 2.30 (2H, m, H-6') 1.95(s, 3H, H-14), 1.15(3H, d, 2'-CH<sub>3</sub>); <sup>13</sup>C-NMR (100MHz, CDCl<sub>3</sub>) δ 193.64(C-5'), 182.40 (C-4), 181.19(C-3'), 166.47 (C-2), 163.13(C-7), 158.83(C-5), 156.73(C-8a), 110.48 (C-6), 108.80 (C-3), 104.82 (C-4a), 102.99(C-4'), 89.23(C-8), 75.56 (C-7'), 55.75 (7-OCH<sub>3</sub>), 42.53(C-6'), 38.81 (C-2'), 27.00(C-1'), 20.34 (2-CH<sub>3</sub>), 20.25 (C-8'), 17.38(2'-CH<sub>3</sub>);

Compound **14**, white powder,  $[\alpha]_D^{25} = +33.86$  ( $c = 0.1$ , CHCl<sub>3</sub>), ESI-MS (negative)  $m/z$  425.42[M-H]<sup>-</sup>, <sup>1</sup>H-NMR (400MHz, C<sub>5</sub>D<sub>5</sub>N) δ 6.46(1H, s, H-8), 6.08(1H, s, H-3), 4.56(1H, m, H-3'), 3.97(2H, s, H-9), 3.79(3H, s, 7-OCH<sub>3</sub>), 3.45(1H, dd,  $J = 16.4$ , 3.0 Hz, H-4'a), 2.67 (1H, dd,  $J = 16.4$ , 11.8 Hz, H-4'b), 2.21(1H, s, 2-CH<sub>3</sub>), 2.20(3H, s, 7'-CH<sub>3</sub>), 1.39(3H, d,  $J = 6.3$  Hz, 3'-CH<sub>3</sub>); <sup>13</sup>C-NMR (100MHz, C<sub>5</sub>D<sub>5</sub>N) δ 182.92(C-4), 171.62(C-1'), 168.10(C-2), 163.69(C-7), 161.49(C-8'), 161.02(C-6'), 158.24(C-5), 157.19(C-8a), 137.62(C-4a'), 116.07(C-5'), 111.09(C-7'), 110.12(C-6), 108.80(C-3), 105.08(C-4a), 101.01(C-8a'), 90.90(C-8), 75.59(C-3'), 56.18(7-OCH<sub>3</sub>), 32.36(C-4'), 20.77(3'-CH<sub>3</sub>), 19.82(2-CH<sub>3</sub>), 19.39 (C-9), 8.49(7'-CH<sub>3</sub>).

Compound **15**, white powder, ESI-MS (negative)  $m/z$  333.33[M-H]<sup>-</sup>, <sup>1</sup>H-NMR (400MHz, CDCl<sub>3</sub>) δ 12.85 (1H, s, 5-OH), 6.35(1H, s, H-8), 6.03(1H, s, H-3), 3.85(3H, s, 7-OCH<sub>3</sub>), 3.37(1H, m, H-13), 2.51-2.93(5H, m, H-9, H-10, H-12), 2.34(s, 3H, 2-CH<sub>3</sub>), 1.16(3H, d,  $J = 6.0$  Hz, H-14), 1.04(3H, d,  $J = 6.6$  Hz, 10-CH<sub>3</sub>); <sup>13</sup>C-NMR (100MHz, CDCl<sub>3</sub>) δ 216.14(C-12), 182.40(C-4), 165.54(C-2), 163.13(C-7,

158.95(C-5), 156.80(C-8a), 110.23(C-7), 108.86(C-3), 104.93(C-4a), 89.40(C-8),  
63.94(C-13), 55.81(7-OCH<sub>3</sub>), 48.65(C-12), 46.10(C-10), 25.39(C-9), 22.23(C-14),  
20.39(2-CH<sub>3</sub>), 15.51(10-CH<sub>3</sub>).
